# Supplementary material for: Reaching strong absorption up to 700 nm with new benzo[g]quinoxaline-based heteroleptic copper(i) complexes for light-harvesting applications
Source: Royal Society of Chemistry journal article supplement (doi:10.1039/d3dt00902e), 2023-01-01
Supplement: d3dt00902e1.pdf [file d3dt00902e1.pdf]

## Supporting information

for

### Reaching strong absorption up to 700 nm with new benzo[g]quinoxaline-based heteroleptic copper(I) complexes for light-harvesting applications

Cecilia Bruschi,<sup>[a]</sup> Xin Gui,<sup>[b]</sup> Olaf Fuhr,<sup>[c,d]</sup> Wim Klopper<sup>[b,c]</sup> and Claudia Bizzarri<sup>\*[a]</sup>

#### Table of contents

1. Experimental procedures
2. <sup>1</sup>H, <sup>13</sup>C NMR of compounds **1-10**
3. Reaction monitoring
4. Cyclic voltammetry of **4-6**
5. Quantum chemical calculations
  - 5a DFT optimized geometries
  - 5b Calculated electronic spectra and natural transition orbitals (NTOs)
6. Single crystal X-ray analysis
  
7. References

## 1. Experimental procedures

### Photoluminescence measurements in solution

UV/Vis absorption spectra were recorded for all the compounds in a solution of  $\text{CH}_2\text{Cl}_2$  (concentrations  $\sim 10^{-5}\text{M}$ ). The instrument used was a Lambda 750 double-beam UV/Vis-NIR spectrometer. Emission and excitation spectra at 298 K were recorded with a Fluoromax 4 from Horiba Jobin. The copper complex solutions were air-free by letting Ar bubbling inside for 10 minutes at least. Lifetime experiments were performed by time-correlated singlephoton counting method (TCSPC) with a DeltaTime kit for DeltaDiode source on FluoroMax systems, including DeltaHub and DeltaDiode controller. NanoLED 370 was used as the excitation source ( $\lambda = 366\text{ nm}$ ).

### Electrochemistry

Cyclic voltammetry experiments were performed with a Gamry Interface 1010B in a three electrodes electrochemical cell. The electrochemical cell was equipped with a GC-disc working electrode,  $\text{Ag}/\text{AgNO}_3$  reference electrode and a Pt wire as the auxiliary electrode. All the experiments were performed in acetonitrile (0.1 M TBAPF<sub>6</sub>) solution, under Ar atmosphere, unless otherwise specified. Ferrocene (Fc) was added after each experiment as an internal standard, according to IUPAC recommendation. The redox properties are reported versus Fc/Fc<sup>+</sup> couple.

## 2. Experimental procedures $^1\text{H}$ , $^{13}\text{C}$ NMR of 1-10

### 2-(bromomethyl)-3-methylbenzo[g]quinoxaline (7)

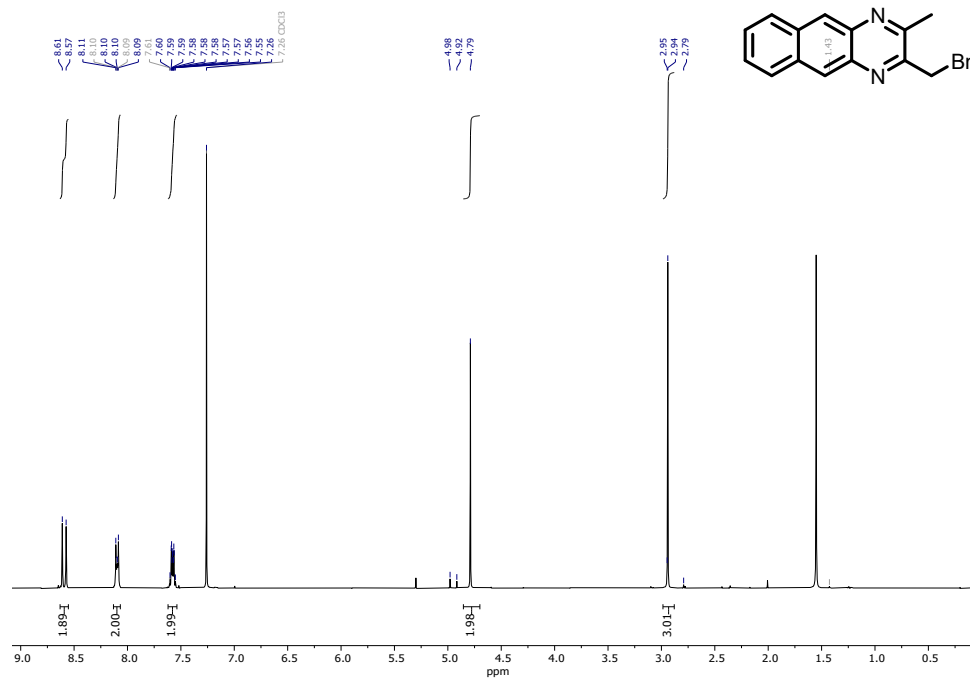

Figure S2.1  $^1\text{H}$  NMR of 7 in  $\text{CDCl}_3$ . (Solvent residuals: 1.55 ppm (water)).

### 2,3-bis(bromomethyl)benzo[g]quinoxaline (8)

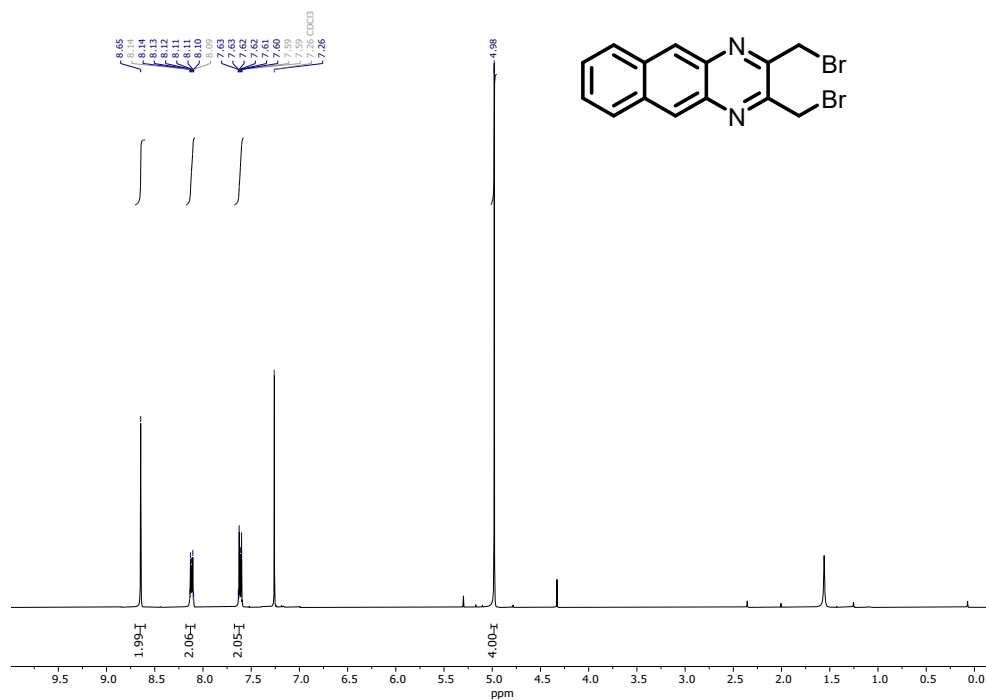

Figure S2.2 <sup>1</sup>H NMR of 8 in CDCl<sub>3</sub>. (Solvent residuals: 1.55 ppm (water)).

2-methyl-3-((4'-phenyl-1'H-1',2',3'-triazol-1'-yl)methyl)benzo[g]quinoxaline (4)

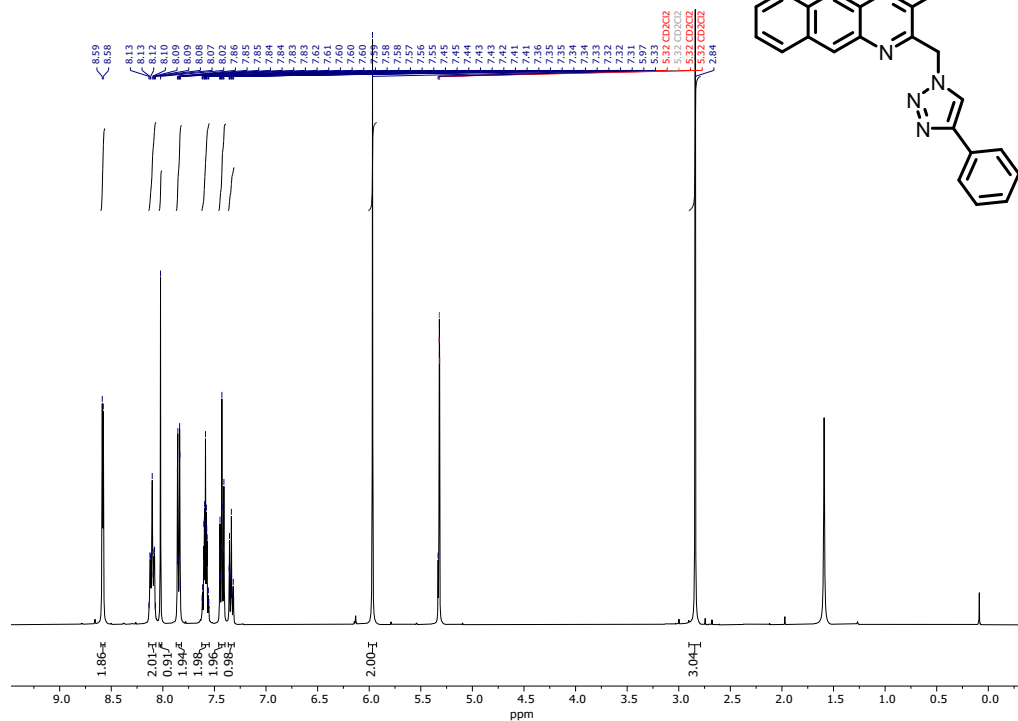

Figure S2.3 <sup>1</sup>H NMR of 4 in CDCl<sub>3</sub>. (Solvent residuals: 1.55 ppm (water)).

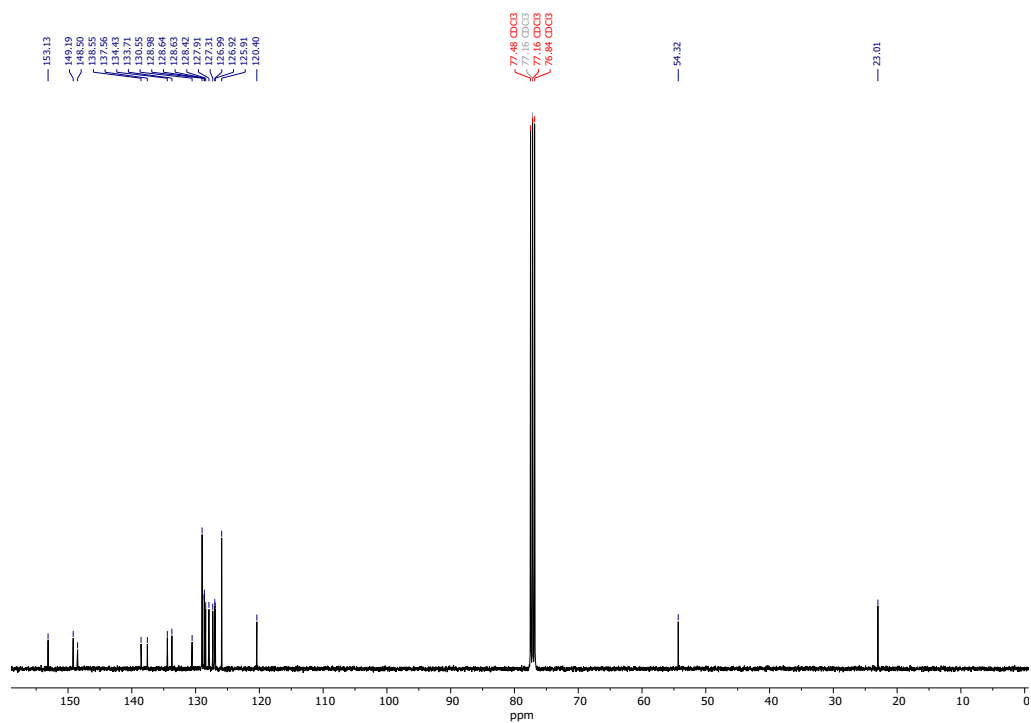

Figure S2.4  $^{13}\text{C}$  NMR of 4 in  $\text{CDCl}_3$ .

2,3-bis((4'-phenyl-1'*H*-1',2',3'-triazol-1'-yl)methyl)benzo[*g*]quinoxaline (5)

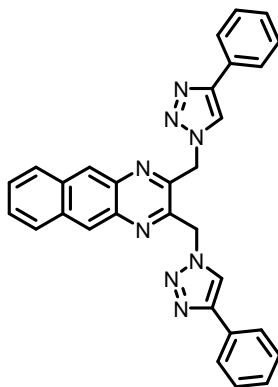

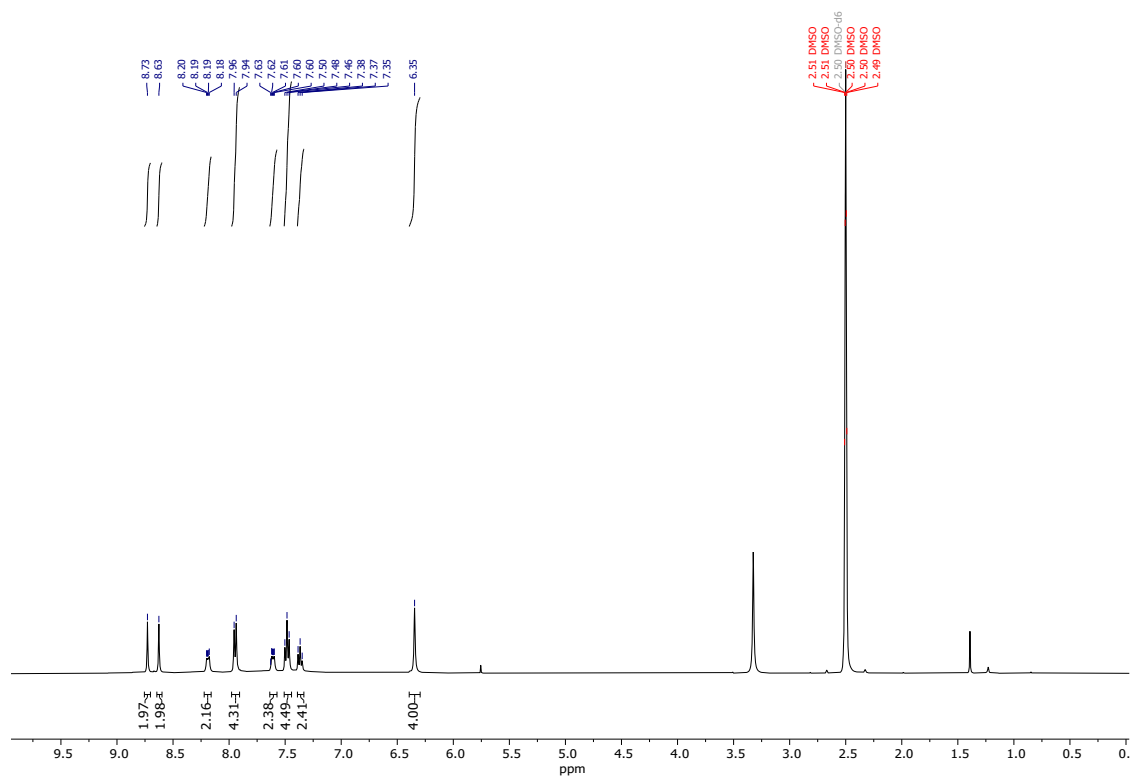

Figure S2.5  $^1\text{H}$  NMR of 5 in  $\text{C}_2\text{D}_6\text{OS}$ .

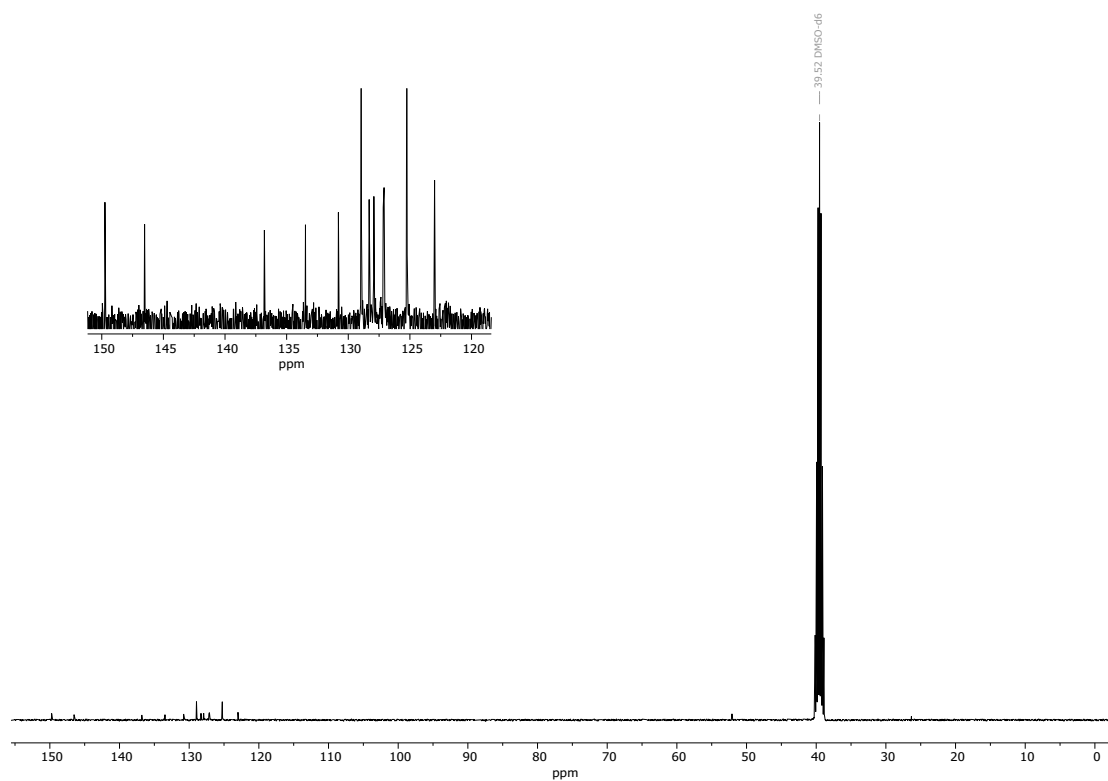

Figure S2.6  $^{13}\text{C}$  NMR of 5 in  $\text{C}_2\text{D}_6\text{OS}$ .

**2,3-bis((triisopropylsilyl)ethynyl)benzo[g]quinoxaline (10)**

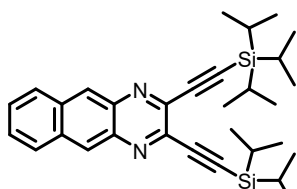

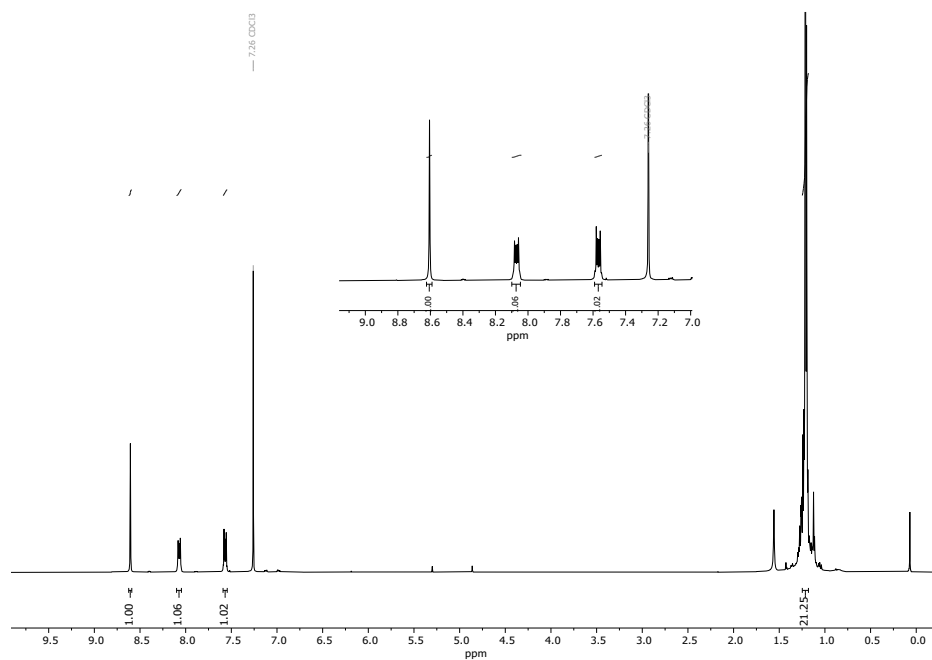

**Figure S2.7**  $^1\text{H}$  NMR of **10** in  $\text{CDCl}_3$  (Residual solvent peaks: 1.56 ppm (water))

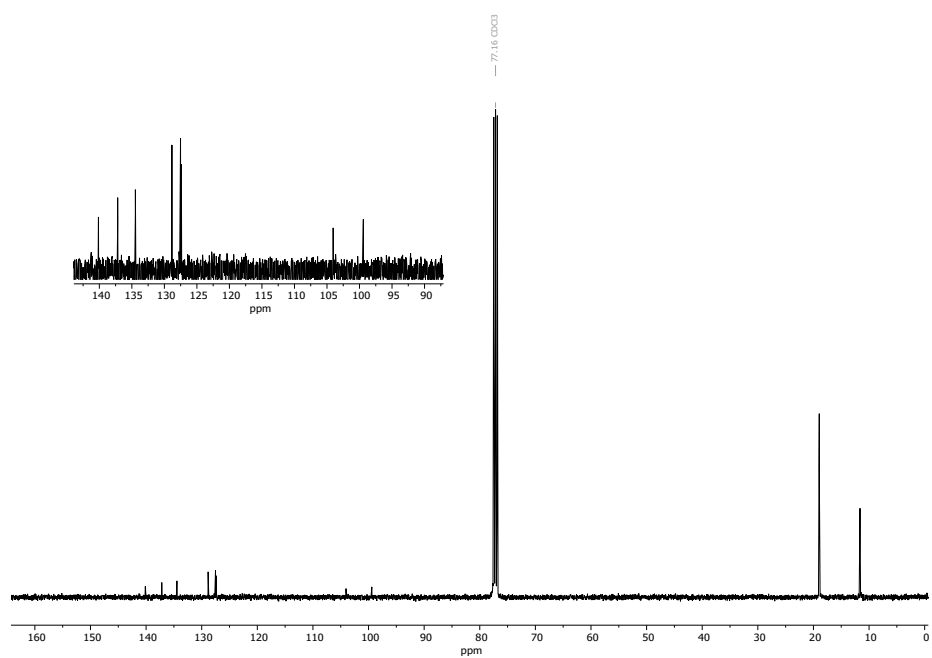

**Figure S2.8**  $^{13}\text{C}$  NMR of **10** in  $\text{CDCl}_3$ .

**2,3-bis(1'-benzyl-1'*H*-1',2',3'-triazol-4'-yl)benzo[*g*]quinoxaline (6)**

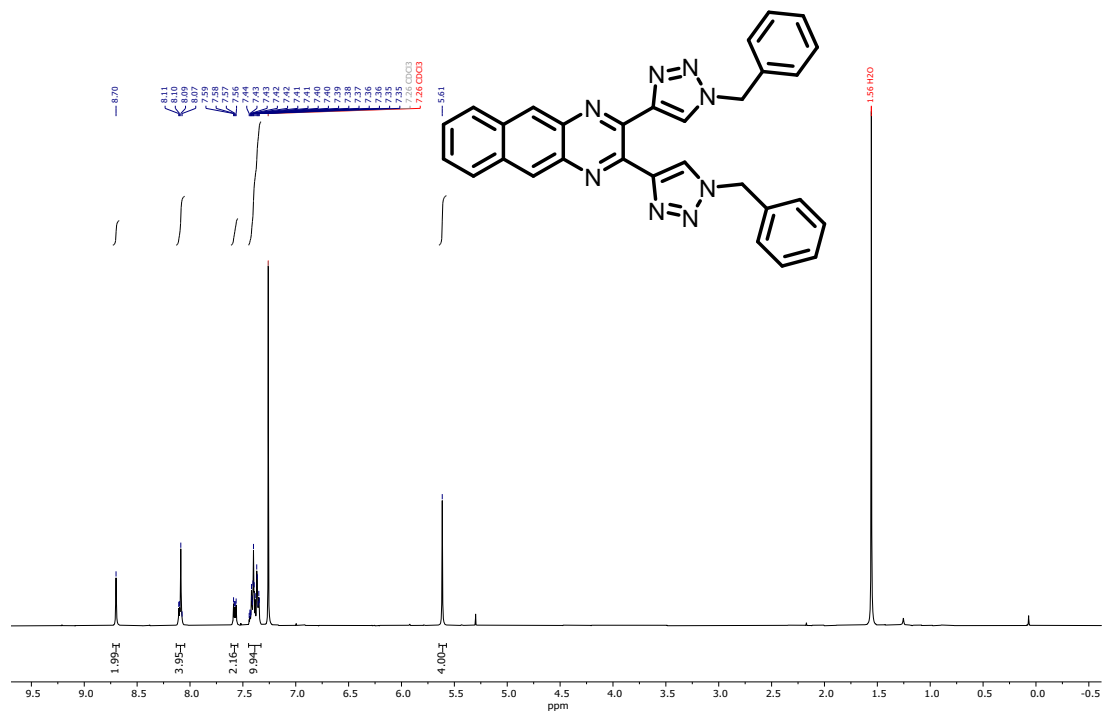

Figure S2.9 <sup>1</sup>H NMR of 6 in CDCl<sub>3</sub> (Residual solvent peaks:1.56 ppm (water))

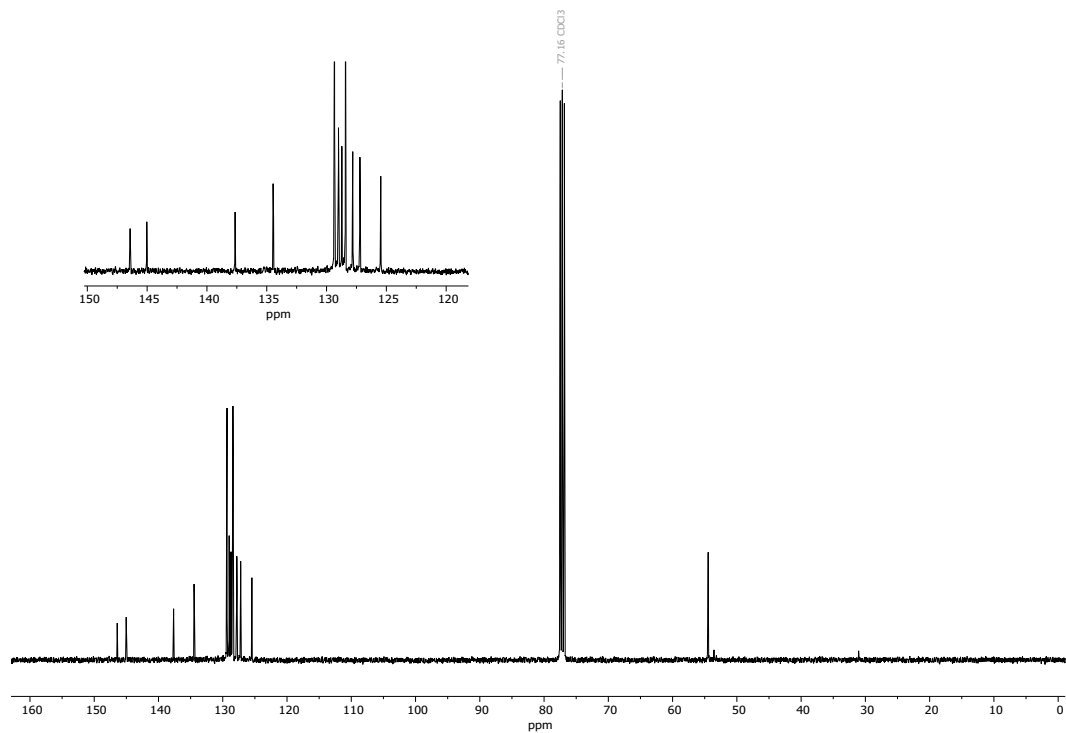

Figure S2.10 <sup>13</sup>C NMR of 6 in CDCl<sub>3</sub>.

### Copper complex 1

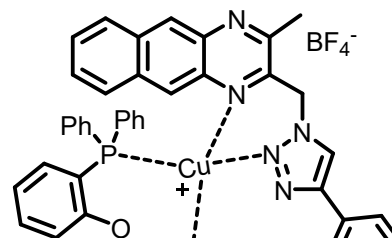



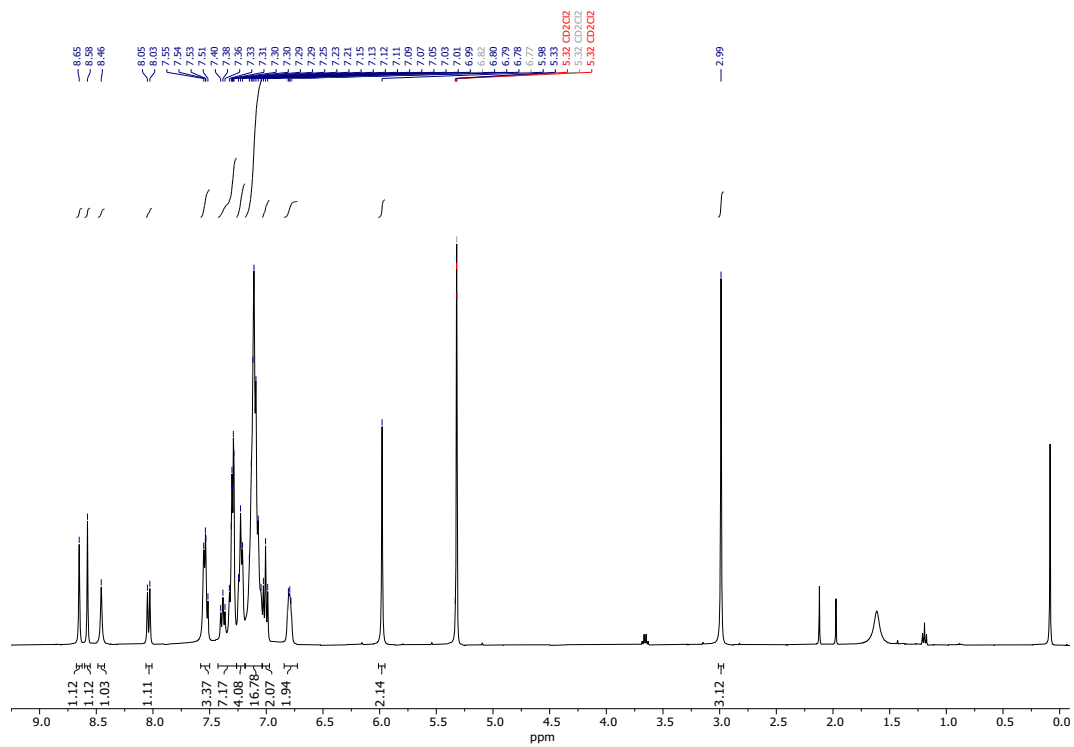

**Figure S2.11**  $^1\text{H}$  NMR of **1** in  $\text{CD}_2\text{Cl}_2$  (Residual solvent peaks: 1.56 ppm (water)).

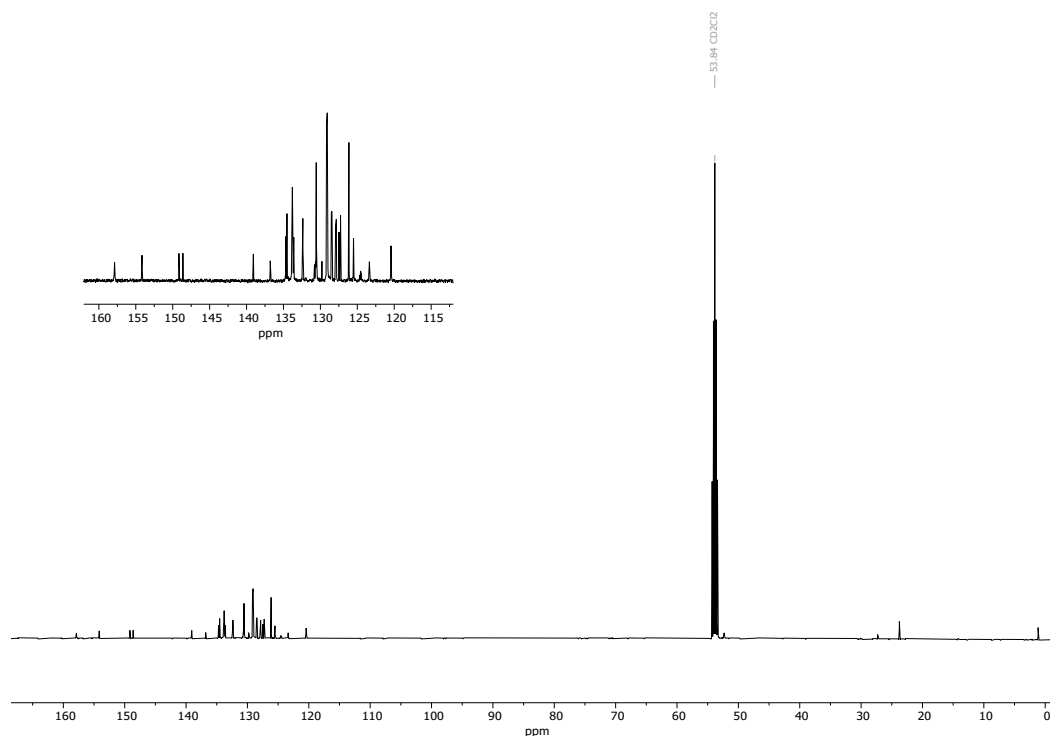

**Figure S2.12**  $^{13}\text{C}$  NMR of **1** in  $\text{CD}_2\text{Cl}_2$ .

**Copper complex 2**

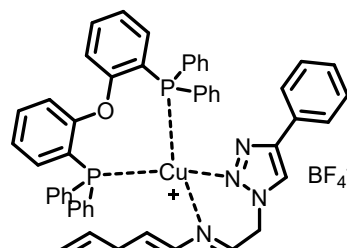

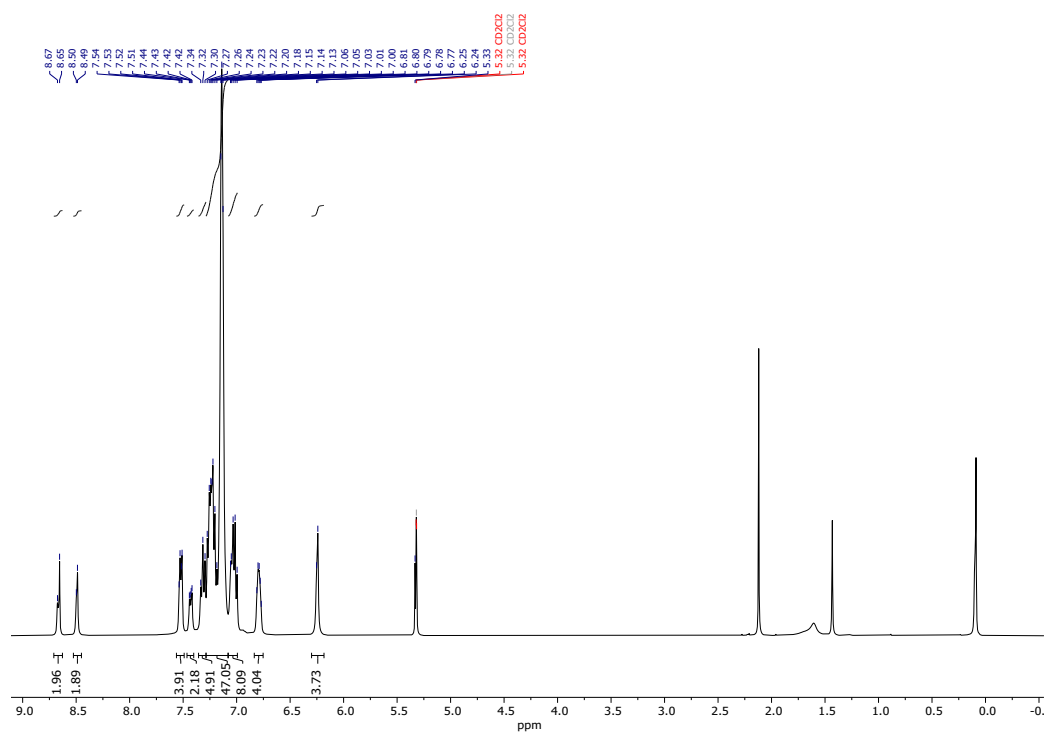

Figure S2.13  $^1\text{H}$  NMR of **2** in  $\text{CD}_2\text{Cl}_2$  (Residual solvent peaks: 1.56 ppm (water)).

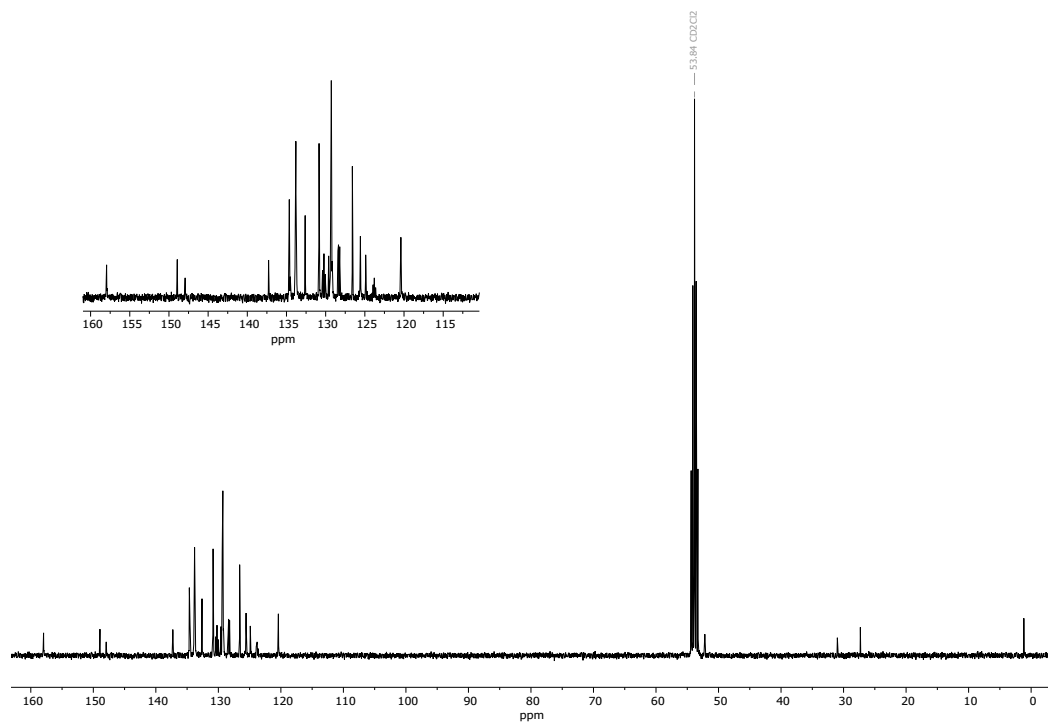

Figure S2.14  $^{13}\text{C}$  NMR of **2** in  $\text{CD}_2\text{Cl}_2$ .

Copper complex 3

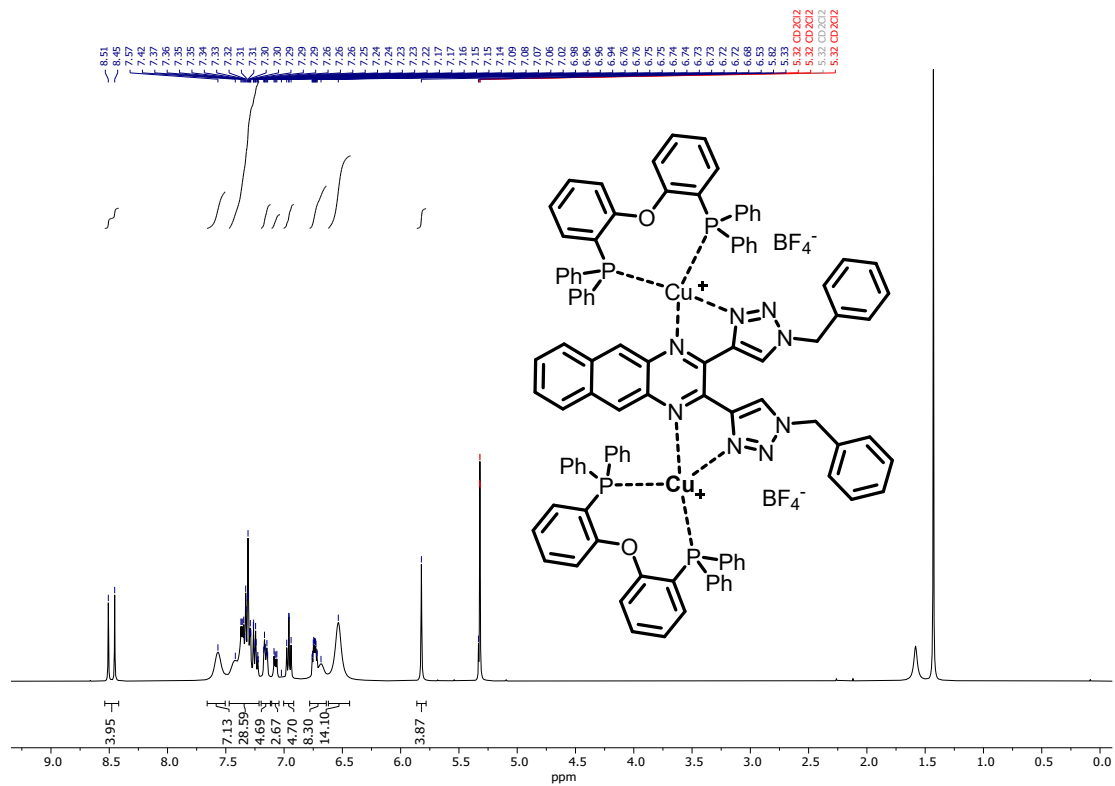

Figure S2.15  $^1\text{H}$  NMR of **3** in  $\text{CD}_2\text{Cl}_2$  (Residual solvent peaks: 1.56 ppm (water), 1.43 ppm (cyclohexane))).

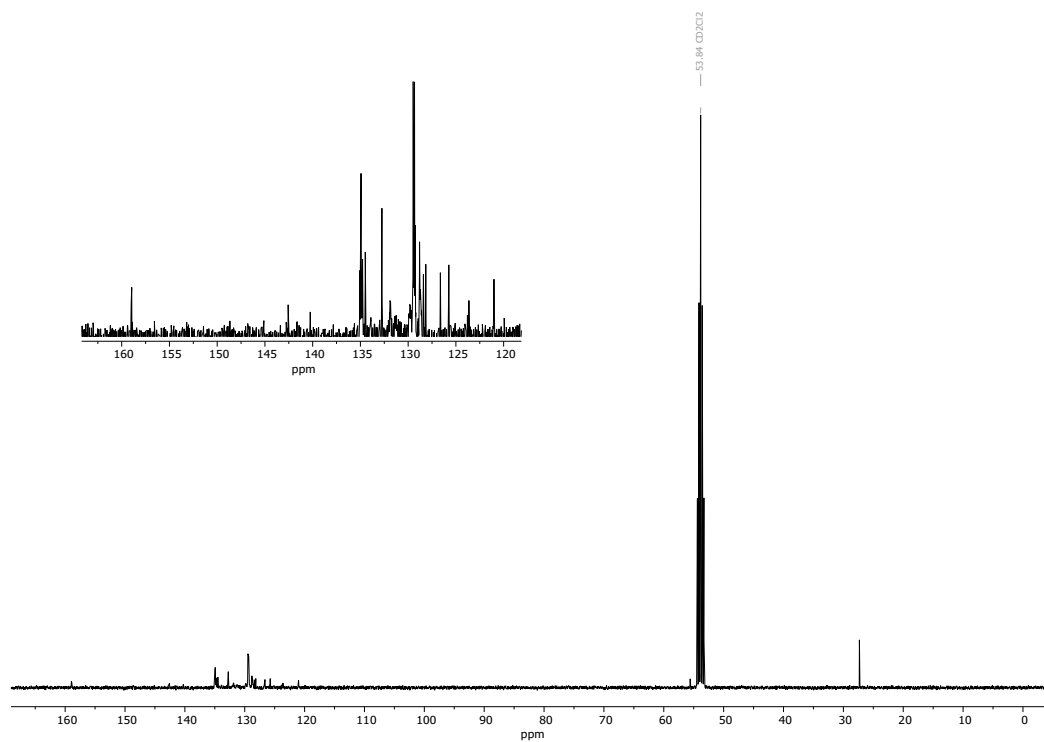

Figure S2.16  $^{13}\text{C}$  NMR of **1** in  $\text{CD}_2\text{Cl}_2$ .

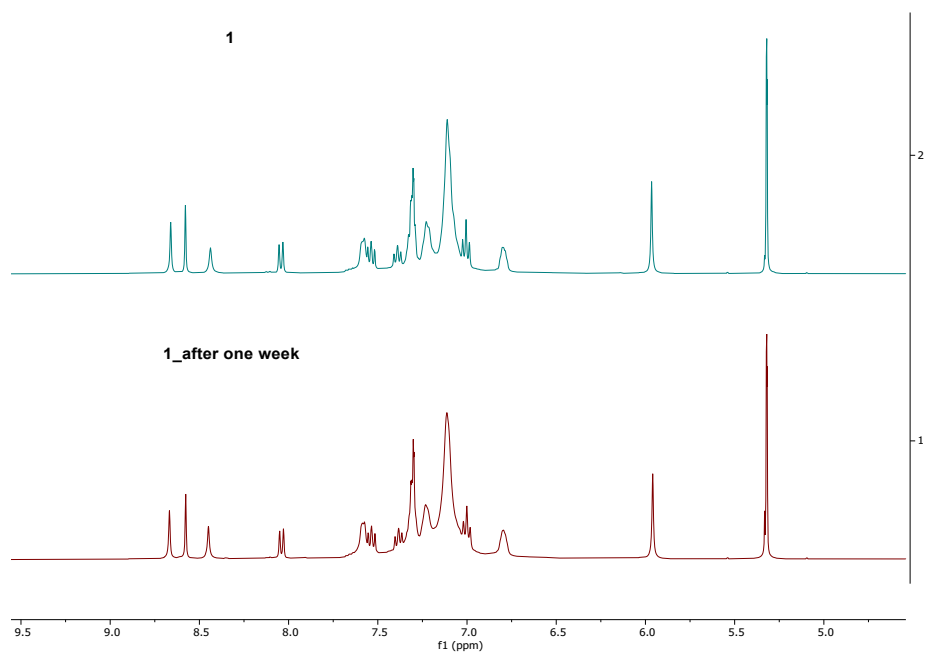

Figure S2.17  $^1\text{H}$  NMR of **1** in  $\text{CD}_2\text{Cl}_2$ : freshly prepared solution (top) and after a week (bottom).

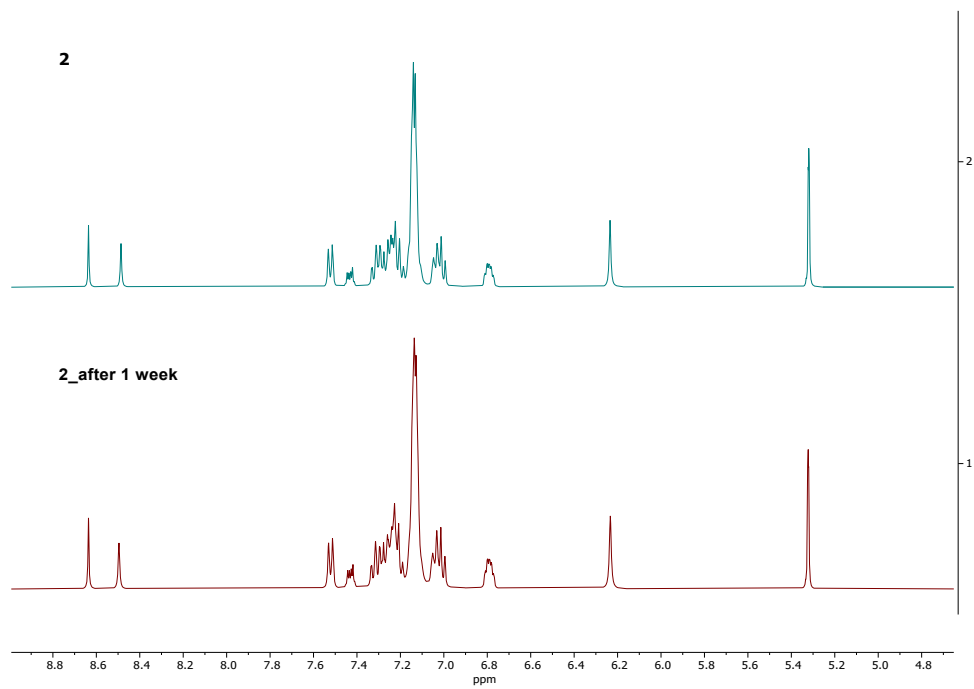

**Figure S2.18**  $^1\text{H}$  NMR of **2** in  $\text{CD}_2\text{Cl}_2$ : freshly prepared solution (top) and after a week (bottom).

### 3. Reaction monitoring

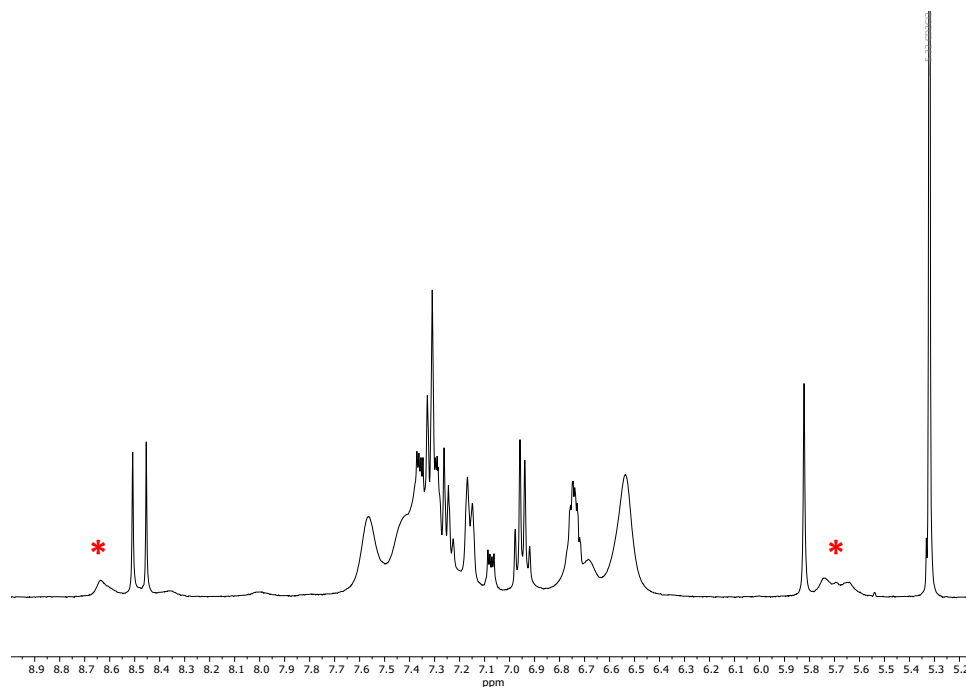

**Figure S3.1**  $^1\text{H}$  NMR of the product of the reaction of the ligand **6** and of the Cu(I) precursor and DPEPhos in a ratio 1:2. The asterisks indicate the peak of the unknown species (most probably the mononuclear species).

**Figure S3.2**  $^1\text{H}$  NMR of the product of the reaction mixture (S4.1) after reaction with an excess of  $[\text{Cu}(\text{DPEPhos})_2]^+$ .

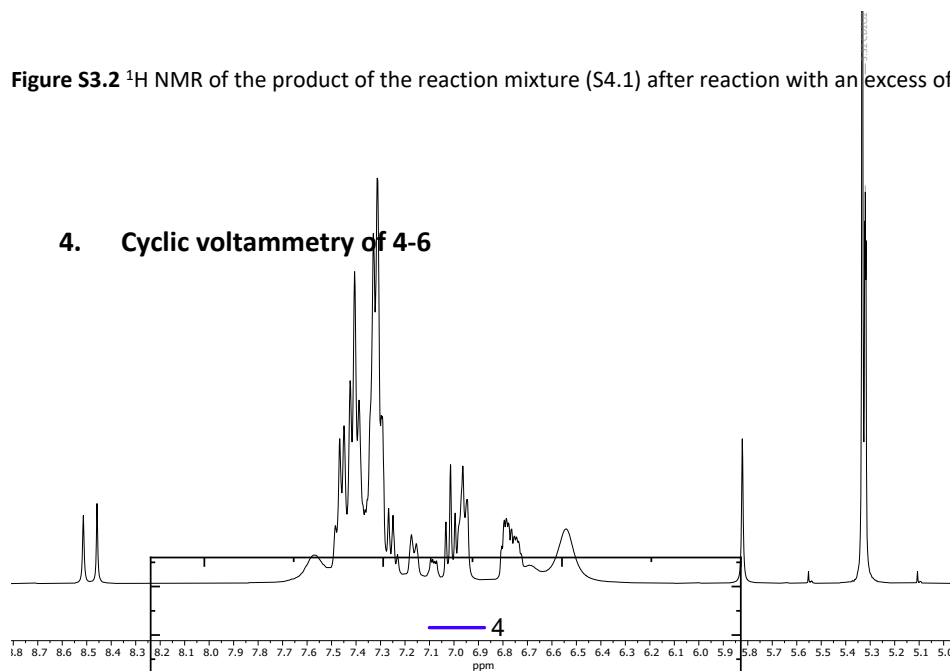

#### 4. Cyclic voltammetry of 4-6

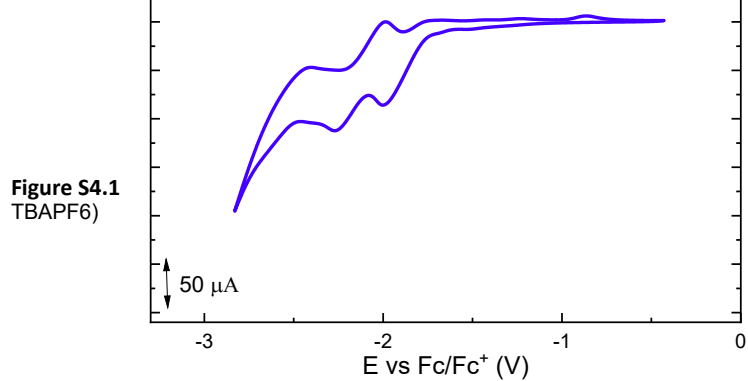

**Figure S4.1**  
TBAPF6)

Cyclic voltammetry of compound **4** in DCM (0.1 M  
at scan rate of 100 mV/s.

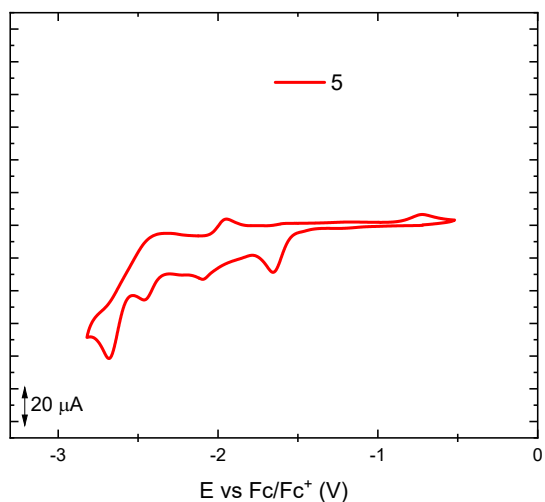

**Figure S4.2** Cyclic voltammety of compound **5** in DMF (0.1 M TBAPF6) at scan rate of 100 mV/s.

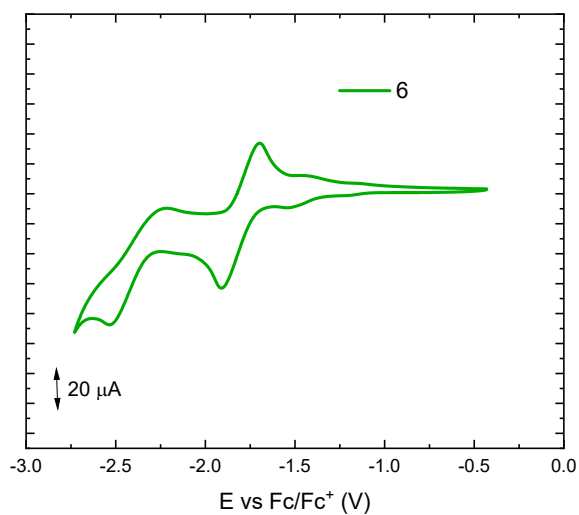

**Figure S4.3** Cyclic voltammety of compound **6** in DCM (0.1 M TBAPF6) at scan rate of 100 mV/s.

## 5. Quantum chemical calculations

### 5.1 DFT optimized geometries

**1**  $S_0$  state:

|   |            |           |            |
|---|------------|-----------|------------|
| C | 0.2444166  | 1.5264529 | -5.2557089 |
| C | 0.9919206  | 1.5538621 | -4.1207589 |
| C | -0.9836749 | 0.8205170 | -5.2930841 |
| C | -1.4399806 | 0.1655279 | -4.1935648 |

**1**  $T_1$  state:

|   |            |           |            |
|---|------------|-----------|------------|
| C | -0.1924717 | 1.2468231 | -5.7884846 |
| C | 0.6805386  | 0.4988873 | -4.9950924 |
| C | -1.4043050 | 1.6629981 | -5.2789783 |
| C | -1.7703319 | 1.3220758 | -3.9740784 |

C 1.2918275 0.9019505 -1.7719835  
C 0.5529020 0.8828247 -2.9490705  
C -0.6953517 0.1762568 -2.9860457  
C -1.1603590 -0.4579802 -1.8392480  
C -0.4336826 -0.4071313 -0.6619054  
C 0.8200786 0.2740645 -0.6280851  
H 0.5883519 2.0442079 -6.1464491  
H 1.9374359 2.0887869 -4.0884278  
H -1.5604103 0.8074074 -6.2135376  
H -2.3792673 -0.3765543 -4.2167550  
H 2.2436051 1.4222519 -1.7186480  
H -2.1211044 -0.9635522 -1.8468268  
N -0.9399885 -0.9397513 0.4938290  
N 1.5430254 0.3462896 0.5181718  
C -0.2299344 -0.8335958 1.5845515  
C 1.0551776 -0.1893996 1.5984103  
C 1.8697574 -0.0910586 2.8498824  
H 1.3341111 0.4545629 3.6464426  
H 2.1350386 -1.0882641 3.2439435  
C -0.8331380 -1.3144341 2.8820737  
H -0.0630879 -1.4147791 3.6535502  
H -1.5667252 -0.5667901 3.2290621  
N -1.5201161 -2.5771947 2.7905215  
C -1.1231103 -3.8035932 3.1703728  
C -2.1868681 -4.6284320 2.8651877  
N -3.1554695 -3.8542508 2.3250973  
N -2.7456474 -2.6281023 2.2766332  
H -0.1637328 -3.9818092 3.6297530  
C -2.3513788 -6.0676294 3.0283870  
C -1.2430896 -6.9021197 3.2132741  
C -1.4101903 -8.2795613 3.3251224  
C -2.6872819 -8.8372627 3.2523708  
C -3.7962836 -8.0091945 3.0715294  
C -3.6317323 -6.6318399 2.9600056  
H -0.2363393 -6.4754605 3.2462893  
H -0.5373506 -8.9234381 3.4657459  
H -2.8184718 -9.9195001 3.3411102  
H -4.7997061 -8.4416612 3.0199549  
H -4.4948022 -5.9780131 2.8126103  
Cu -2.9735973 -1.4946920 0.4641195  
P -4.1988540 0.4152905 0.4104054  
P -3.7408027 -3.2383581 -0.8126357  
C -2.7292773 -4.7355277 -0.6796564  
C -3.2500317 -6.0035024 -0.4064132  
C -2.3947022 -7.0966492 -0.2678447  
C -1.0180438 -6.9315286 -0.4031126  
C -0.4908758 -5.6670406 -0.6754107  
C -1.3415128 -4.5726816 -0.8053168  
H -4.3270804 -6.1370892 -0.2790012  
H -2.8080644 -8.0810615 -0.0322694  
H -0.3509554 -7.7903053 -0.2866269  
H 0.5895882 -5.5326799 -0.7812063  
H -0.9263725 -3.5778873 -1.0027942

C 1.2177164 -0.5638769 -2.8437705  
C 0.3405624 0.1573794 -3.6893509  
C -0.9231006 0.5634394 -3.1767707  
C -1.2852344 0.1929938 -1.8587797  
C -0.4056952 -0.5011583 -1.0122202  
C 0.8849059 -0.8768535 -1.5058206  
H 0.0932026 1.5062136 -6.8032464  
H 1.6423504 0.1836711 -5.3920476  
H -2.0763269 2.2593617 -5.8886320  
H -2.7186945 1.6544548 -3.5608336  
H 2.1914810 -0.8830699 -3.2052132  
H -2.2641339 0.4628499 -1.4819221  
N -0.7643539 -0.8138523 0.2421903  
N 1.7612254 -1.5316867 -0.7481750  
C 0.1871293 -1.3925819 1.0321887  
C 1.4187132 -1.7679359 0.5378929  
C 2.4488873 -2.4723675 1.3644130  
H 2.8406468 -1.8284127 2.1715164  
H 2.0449949 -3.3908431 1.8243997  
C -0.1744026 -1.5474597 2.4773301  
H 0.6962274 -1.8363112 3.0744460  
H -0.5591972 -0.5892508 2.8584224  
N -1.2103143 -2.5346340 2.7156380  
C -1.1200960 -3.7823259 3.1995881  
C -2.4157629 -4.2598996 3.1882530  
N -3.2028088 -3.2759869 2.6966564  
N -2.4689073 -2.2473668 2.4103256  
H -0.1788615 -4.2150638 3.4978188  
C -2.9420469 -5.5698467 3.5521900  
C -2.1268353 -6.5300226 4.1640450  
C -2.6245806 -7.7978550 4.4524444  
C -3.9439760 -8.1211684 4.1333752  
C -4.7636380 -7.1662150 3.5296541  
C -4.2689000 -5.8978390 3.2412673  
H -1.0912941 -6.2876740 4.4196508  
H -1.9786614 -8.5388686 4.9319710  
H -4.3342484 -9.1176632 4.3587043  
H -5.7990690 -7.4130754 3.2778879  
H -4.9044781 -5.1521591 2.7570455  
Cu -2.7898694 -1.1103297 0.6295901  
P -4.3573061 0.5204672 0.6027597  
P -3.3456353 -2.9229243 -0.7161053  
C -2.1941880 -4.3019141 -0.4637826  
C -2.5969197 -5.4994928 0.1371158  
C -1.6548848 -6.4725442 0.4716605  
C -0.3037639 -6.2627526 0.2025051  
C 0.1058583 -5.0766411 -0.4130478  
C -0.8319642 -4.1016505 -0.7382524  
H -3.6512531 -5.6711898 0.3637297  
H -1.9858818 -7.3963787 0.9544586  
H 0.4330684 -7.0283852 0.4625096  
H 1.1617286 -4.9070925 -0.6444872  
H -0.5019384 -3.1790791 -1.2229696



C -3.8860574 -2.9888404 -2.6128533  
C -4.4503116 -1.7857002 -3.0611439  
C -4.6583808 -1.5374553 -4.4141365  
C -4.2896956 -2.5033586 -5.3502949  
C -3.7029914 -3.6961707 -4.9281806  
C -3.5039483 -3.9364888 -3.5689498  
H -5.0923652 -0.5820823 -4.7198930  
H -4.4511830 -2.3161599 -6.4155015  
H -3.4003438 -4.4480618 -5.6618947  
H -3.0467868 -4.8742842 -3.2414536  
C -5.4457882 -3.7086505 -0.3988990  
C -6.2198729 -4.5007626 -1.2579374  
C -7.5420305 -4.7983845 -0.9377342  
C -8.1057731 -4.2974539 0.2367387  
C -7.3431389 -3.5040811 1.0930225  
C -6.0177305 -3.2134512 0.7781531  
H -5.7922891 -4.8763528 -2.1921101  
H -8.1391638 -5.4180555 -1.6130178  
H -9.1477581 -4.5228114 0.4822936  
H -7.7843088 -3.1016763 2.0090338  
H -5.4204125 -2.5880299 1.4457543  
C -4.5631932 1.1949750 2.0043206  
C -4.6140759 0.3790940 3.1428204  
C -4.9237921 0.9262667 4.3871506  
C -5.1716287 2.2943786 4.5033173  
C -5.1155653 3.1132216 3.3740945  
C -4.8163097 2.5672262 2.1274683  
H -4.4110280 -0.6930976 3.0476262  
H -4.9686468 0.2829657 5.2707465  
H -5.4088805 2.7264252 5.4798832  
H -5.3092369 4.1859218 3.4651145  
H -4.7745999 3.2105155 1.2439001  
C -5.8310339 0.1049485 -0.3171341  
C -5.8848087 -0.6190816 -1.5194904  
C -7.0855326 -1.1060541 -2.0237430  
C -8.2638011 -0.8520975 -1.3235224  
C -8.2417001 -0.1092980 -0.1439554  
C -7.0297401 0.3621230 0.3565072  
O -4.6823846 -0.7948617 -2.1426789  
H -7.0950957 -1.6895372 -2.9471619  
H -9.2098777 -1.2403532 -1.7107166  
H -9.1699531 0.0949860 0.3957185  
H -7.0089184 0.9191169 1.2966564  
C -3.3977705 1.7181051 -0.5623143  
C -3.8759175 2.1499193 -1.8026804  
C -3.1282968 3.0445105 -2.5689622  
C -1.9076648 3.5250591 -2.0990477  
C -1.4390284 3.1224323 -0.8466612  
C -2.1765175 2.2205021 -0.0869245  
H -4.8344394 1.7843931 -2.1770820  
H -3.5057034 3.3695433 -3.5426158  
H -1.3212715 4.2204270 -2.7060305  
H -0.4886482 3.5058766 -0.4649828

C -3.2886515 -2.5944525 -2.5063510  
C -3.9022209 -1.4246074 -2.9832119  
C -3.9192633 -1.1144545 -4.3383918  
C -3.3000519 -1.9694407 -5.2485351  
C -2.6708952 -3.1286524 -4.7962791  
C -2.6722180 -3.4398454 -3.4373365  
H -4.4092834 -0.1943057 -4.6638785  
H -3.3057344 -1.7237863 -6.3140109  
H -2.1806762 -3.8006787 -5.5057690  
H -2.1822512 -4.3533299 -3.0900210  
C -4.9914946 -3.6601380 -0.5062137  
C -5.5053382 -4.5647932 -1.4454954  
C -6.7668270 -5.1235690 -1.2620541  
C -7.5263640 -4.7805875 -0.1413400  
C -7.0216195 -3.8785716 0.7938923  
C -5.7573183 -3.3196904 0.6130943  
H -4.9172235 -4.8307922 -2.3287556  
H -7.1615539 -5.8301970 -1.9978907  
H -8.5193638 -5.2175008 -0.0001855  
H -7.6167813 -3.6006393 1.6682764  
H -5.3573766 -2.6184253 1.3480411  
C -4.9986395 1.0765844 2.2010691  
C -5.0054615 0.1603869 3.2616050  
C -5.5290599 0.5266995 4.5000728  
C -6.0340085 1.8133506 4.6903975  
C -6.0196531 2.7327419 3.6402574  
C -5.5071057 2.3668112 2.3973054  
H -4.5928640 -0.8433924 3.1170188  
H -5.5338151 -0.1935650 5.3231521  
H -6.4370340 2.1041678 5.6649190  
H -6.4112969 3.7429218 3.7906364  
H -5.4988018 3.0888907 1.5758389  
C -5.8339053 -0.0451521 -0.2881312  
C -5.6542477 -0.6291818 -1.5519883  
C -6.6975323 -1.2680833 -2.2133399  
C -7.9540675 -1.3107569 -1.6118958  
C -8.1665091 -0.7072966 -0.3731537  
C -7.1097362 -0.0806680 0.2841007  
O -4.4006452 -0.5100457 -2.0874758  
H -6.5220543 -1.7369715 -3.1844408  
H -8.7751720 -1.8205321 -2.1232207  
H -9.1562009 -0.7348133 0.0899440  
H -7.2687554 0.3680111 1.2680042  
C -3.8393474 2.0388038 -0.2450025  
C -4.5853029 2.6301735 -1.2698379  
C -4.0966887 3.7573565 -1.9312568  
C -2.8644024 4.3031920 -1.5714684  
C -2.1194947 3.7228748 -0.5428621  
C -2.6017601 2.5934758 0.1126450  
H -5.5530199 2.2071345 -1.5534923  
H -4.6873254 4.2165042 -2.7296362  
H -2.4832120 5.1864756 -2.0918893  
H -1.1537657 4.1485811 -0.2563839

H -1.7986353 1.8985761 0.8891088  
H 2.7983894 0.4494987 2.6210916

H -2.0063038 2.1229118 0.9021594  
H 3.2899499 -2.7498340 0.7140199

**2 S<sub>0</sub> state:**

C 0.4901366 0.5122458 -5.5220470  
C 0.9787567 1.0062801 -4.3534925  
C -0.4901366 -0.5122458 -5.5220470  
C -0.9787567 -1.0062801 -4.3534925  
C 1.0194547 0.9616328 -1.9034045  
C 0.5101767 0.5048955 -3.1123362  
C -0.5101767 -0.5048955 -3.1123362  
C -1.0194547 -0.9616328 -1.9034045  
C -0.5309355 -0.4786610 -0.7024035  
C 0.5309355 0.4786610 -0.7024035  
H 0.8518744 0.9004453 -6.4694451  
H 1.7303748 1.7891888 -4.3480928  
H -0.8518744 -0.9004453 -6.4694451  
H -1.7303748 -1.7891888 -4.3480928  
H 1.8099235 1.7051751 -1.8870159  
H -1.8099235 -1.7051751 -1.8870159  
N -1.0461408 -0.9279600 0.4772507  
N 1.0461408 0.9279600 0.4772507  
C -0.5207939 -0.4860864 1.5884273  
C 0.5207939 0.4860864 1.5884273  
C 1.0664180 1.0254754 2.8920531  
H 0.3048451 0.9909353 3.6801907  
H 1.9286475 0.4185937 3.2172864  
N 1.5079835 2.3902007 2.7982260  
C 0.8609658 3.5278614 3.1077337  
C 1.7453877 4.5363614 2.7803341  
N 2.8667542 3.9496234 2.2989527  
N 2.7121264 2.6659811 2.2994241  
H -0.1231634 3.5319020 3.5497368  
C 1.6001136 5.9839277 2.8646007  
C 0.3299992 6.5730920 2.9089825  
C 0.1993264 7.9576221 2.9595772  
C 1.3372219 8.7659383 2.9674145  
C 2.6041043 8.1831421 2.9234624  
C 2.7380024 6.7990649 2.8695790  
H -0.5664910 5.9456241 2.8835955  
H -0.7954499 8.4104498 2.9917224  
H 1.2351112 9.8538035 3.0121667  
H 3.4970099 8.8143602 2.9336353  
H 3.7267479 6.3367978 2.8296442  
Cu 3.0693663 1.6348462 0.4423485  
P 4.1798658 -0.3589237 0.5275808  
P 3.9902545 3.3018366 -0.8302086  
C 3.2397621 4.9460775 -0.7205040  
C 3.9767745 6.1322281 -0.6505250  
C 3.3174945 7.3584823 -0.5637293  
C 1.9248633 7.4096911 -0.5422408  
C 1.1850820 6.2279907 -0.6034885  
C 1.8409420 5.0029752 -0.6882602

**2 T<sub>1</sub> state:**

C 0.4669531 0.5151629 -5.5138436  
C 0.9411056 1.0274317 -4.3177502  
C -0.4669535 -0.5151572 -5.5138340  
C -0.9411101 -1.0274300 -4.3177463  
C 0.9784888 0.9884709 -1.8627457  
C 0.4865096 0.5175768 -3.0991377  
C -0.4864981 -0.5175631 -3.0991748  
C -0.9785206 -0.9885021 -1.8627300  
C -0.5304266 -0.4821805 -0.6485092  
C 0.5304385 0.4821892 -0.6485147  
H 0.8277514 0.9194038 -6.4544309  
H 1.6724994 1.8300314 -4.3154419  
H -0.8277520 -0.9194026 -6.4544331  
H -1.6724997 -1.8300324 -4.3154433  
H 1.7411404 1.7618118 -1.8499781  
H -1.7411262 -1.7617951 -1.8499776  
N -1.0911581 -0.8927925 0.5122018  
N 1.0911575 0.8927890 0.5122069  
C -0.5400062 -0.4225632 1.6663274  
C 0.5400111 0.4225649 1.6663295  
C 1.2267492 0.8780800 2.9279858  
H 0.6017432 0.7400015 3.8153754  
H 2.1630989 0.3147278 3.0729390  
N 1.6019429 2.2701613 2.8760594  
C 0.9043760 3.3721771 3.1935969  
C 1.7318874 4.4246678 2.8504303  
N 2.8716233 3.8954519 2.3485808  
N 2.7792233 2.6044617 2.3521661  
H -0.0725590 3.3274324 3.6488184  
C 1.5143130 5.8631396 2.9373741  
C 0.2159864 6.3886610 2.9634383  
C 0.0157156 7.7650843 3.0132299  
C 1.1116506 8.6289989 3.0390137  
C 2.4064535 8.1096932 3.0139702  
C 2.6097918 6.7340830 2.9610321  
H -0.6472084 5.7167561 2.9239636  
H -1.0007528 8.1678590 3.0308645  
H 0.9548758 9.7103668 3.0835863  
H 3.2666872 8.7844425 3.0387496  
H 3.6207993 6.3214701 2.9359166  
Cu 3.0195716 1.5851441 0.4282065  
P 4.2048365 -0.3895412 0.4458620  
P 4.0066481 3.2644489 -0.7931936  
C 3.2626335 4.9066223 -0.6351464  
C 4.0069124 6.0873236 -0.5524251  
C 3.3531020 7.3158356 -0.4576620  
C 1.9602661 7.3736938 -0.4412288  
C 1.2139961 6.1966587 -0.5131465  
C 1.8645471 4.9695143 -0.6051671

H 5.0692636 6.1016227 -0.6529758  
H 3.8993901 8.2822668 -0.5029166  
H 1.4128507 8.3718741 -0.4594661  
H 0.0925847 6.2668812 -0.5674799  
H 1.2687410 4.0698799 -0.7145591  
C 4.0418746 2.9854254 -2.6259666  
C 4.4155782 1.7030482 -3.0565060  
C 4.5205362 1.3883220 -4.4071329  
C 4.2490923 2.3704029 -5.3598568  
C 3.8521411 3.6449966 -4.9555201  
C 3.7472906 3.9489232 -3.5976509  
H 4.8055540 0.3749748 -4.7000024  
H 4.3382224 2.1329251 -6.4234364  
H 3.6288080 4.4123472 -5.7013268  
H 3.4407554 4.9507603 -3.2852810  
C 5.7462695 3.5135469 -0.4359960  
C 6.6525243 4.0638472 -1.3525196  
C 7.9979826 4.1892698 -1.0167121  
C 8.4501403 3.7579070 0.2311746  
C 7.5536836 3.2084818 1.1472689  
C 6.2061684 3.0888865 0.8158396  
H 6.3091494 4.3846164 -2.3402596  
H 8.7004036 4.6199912 -1.7357866  
H 9.5089261 3.8488439 0.4896338  
H 7.9067436 2.8666339 2.1239095  
H 5.5009488 2.6579288 1.5323424  
C 4.6212628 -0.9926928 2.1680124  
C 4.7168465 -0.0827799 3.2294689  
C 5.1006156 -0.5164367 4.4989089  
C 5.3863275 -1.8636229 4.7173513  
C 5.2940256 -2.7766869 3.6643196  
C 4.9166880 -2.3453029 2.3949447  
H 4.4951166 0.9749892 3.0557940  
H 5.1810939 0.2019672 5.3195595  
H 5.6890541 -2.2050161 5.7113216  
H 5.5278180 -3.8317737 3.8327886  
H 4.8549405 -3.0634252 1.5723622  
C 5.7639484 -0.2709017 -0.3517695  
C 5.8009465 0.4036897 -1.5827166  
C 7.0037262 0.7091229 -2.2087831  
C 8.1987487 0.3239145 -1.6041178  
C 8.1893014 -0.3657433 -0.3931243  
C 6.9778965 -0.6546834 0.2298221  
O 4.5795445 0.7247325 -2.1099918  
H 7.0061663 1.2538443 -3.1552223  
H 9.1471229 0.5675929 -2.0904115  
H 9.1283120 -0.6698209 0.0755632  
H 6.9773132 -1.1650589 1.1954531  
C 3.1911737 -1.6962209 -0.2068877  
C 3.2661390 -2.0026019 -1.5712450  
C 2.4046344 -2.9428867 -2.1323903  
C 1.4631519 -3.5969424 -1.3402387  
C 1.3857497 -3.3060974 0.0220929

H 5.0993076 6.0504669 -0.5547413  
H 3.9393083 8.2363526 -0.3882046  
H 1.4528788 8.3378905 -0.3538708  
H 0.1215761 6.2397232 -0.4805765  
H 1.2894478 4.0389448 -0.6385389  
C 4.0345553 3.0083278 -2.5995737  
C 4.3908556 1.7399123 -3.0813528  
C 4.4722490 1.4709798 -4.4435939  
C 4.1951350 2.4883327 -5.3567367  
C 3.8166868 3.7513070 -4.9013402  
C 3.7346572 4.0084124 -3.5323606  
H 4.7440055 0.4661984 -4.7759527  
H 4.2668770 2.2885720 -6.4293872  
H 3.5915054 4.5471618 -5.6160285  
H 3.4427768 5.0017047 -3.1817210  
C 5.7608067 3.4577146 -0.3926759  
C 6.6795799 3.9893445 -1.3073725  
C 8.0208711 4.1173032 -0.9557187  
C 8.4549548 3.7092360 0.3062601  
C 7.5447634 3.1798456 1.2209420  
C 6.2019347 3.0556269 0.8733920  
H 6.3488069 4.2959270 -2.3038441  
H 8.7337620 4.5340388 -1.6726988  
H 9.5101937 3.8036606 0.5776716  
H 7.8832696 2.8588113 2.2097044  
H 5.4847464 2.6442745 1.5890772  
C 4.6682073 -1.0440971 2.0698925  
C 4.8224120 -0.1435282 3.1325424  
C 5.2284352 -0.5969133 4.3877997  
C 5.4788133 -1.9535399 4.5904564  
C 5.3293352 -2.8567954 3.5355686  
C 4.9289337 -2.4065927 2.2799977  
H 4.6245516 0.9208775 2.9730788  
H 5.3519079 0.1132860 5.2102048  
H 5.7979019 -2.3104538 5.5737899  
H 5.5357377 -3.9194940 3.6913629  
H 4.8227177 -3.1169493 1.4554140  
C 5.7739406 -0.2970291 -0.4531412  
C 5.7943535 0.3897781 -1.6766087  
C 6.9873613 0.6855723 -2.3252783  
C 8.1890020 0.2790706 -1.7479852  
C 8.1952787 -0.4204947 -0.5423758  
C 6.9936691 -0.7006856 0.1026131  
O 4.5644906 0.7315994 -2.1703398  
H 6.9785126 1.2389547 -3.2666075  
H 9.1307735 0.5138088 -2.2512384  
H 9.1396919 -0.7405619 -0.0958782  
H 7.0049862 -1.2214092 1.0626223  
C 3.1793633 -1.6913878 -0.2916984  
C 3.2108931 -1.9732497 -1.6637480  
C 2.3116861 -2.8820945 -2.2171640  
C 1.3762876 -3.5278127 -1.4106294  
C 1.3442471 -3.2617141 -0.0403636

C 2.2376015 -2.3573884 0.5828465  
H 3.9988621 -1.5015141 -2.2037778  
H 2.4776557 -3.1730833 -3.1988364  
H 0.7987100 -4.3403627 -1.7876943  
H 0.6585999 -3.8242188 0.6554744  
H 2.1814979 -2.1489791 1.6555741  
C -1.0664180 -1.0254754 2.8920531  
H -0.3048451 -0.9909353 3.6801907  
H -1.9286475 -0.4185937 3.2172864  
N -1.5079835 -2.3902007 2.7982260  
C -0.8609658 -3.5278614 3.1077337  
C -1.7453877 -4.5363614 2.7803341  
N -2.8667542 -3.9496234 2.2989527  
N -2.7121264 -2.6659811 2.2994241  
H 0.1231634 -3.5319020 3.5497368  
C -1.6001136 -5.9839277 2.8646007  
C -0.3299992 -6.5730920 2.9089825  
C -0.1993264 -7.9576221 2.9595772  
C -1.3372219 -8.7659383 2.9674145  
C -2.6041043 -8.1831421 2.9234624  
C -2.7380024 -6.7990649 2.8695790  
H 0.5664910 -5.9456241 2.8835955  
H 0.7954499 -8.4104498 2.9917224  
H -1.2351112 -9.8538035 3.0121667  
H -3.4970099 -8.8143602 2.9336353  
H -3.7267479 -6.3367978 2.8296442  
Cu -3.0693663 -1.6348462 0.4423485  
P -4.1798658 0.3589237 0.5275808  
P -3.9902545 -3.3018366 -0.8302086  
C -3.2397621 -4.9460775 -0.7205040  
C -3.9767745 -6.1322281 -0.6505250  
C -3.3174945 -7.3584823 -0.5637293  
C -1.9248633 -7.4096911 -0.5422408  
C -1.1850820 -6.2279907 -0.6034885  
C -1.8409420 -5.0029752 -0.6882602  
H -5.0692636 -6.1016227 -0.6529758  
H -3.8993901 -8.2822668 -0.5029166  
H -1.4128507 -8.3718741 -0.4594661  
H -0.0925847 -6.2668812 -0.5674799  
H -1.2687410 -4.0698799 -0.7145591  
C -4.0418746 -2.9854254 -2.6259666  
C -4.4155782 -1.7030482 -3.0565060  
C -4.5205362 -1.3883220 -4.4071329  
C -4.2490923 -2.3704029 -5.3598568  
C -3.8521411 -3.6449966 -4.9555201  
C -3.7472906 -3.9489232 -3.5976509  
H -4.8055540 -0.3749748 -4.7000024  
H -4.3382224 -2.1329251 -6.4234364  
H -3.6288080 -4.4123472 -5.7013268  
H -3.4407554 -4.9507603 -3.2852810  
C -5.7462695 -3.5135469 -0.4359960  
C -6.6525243 -4.0638472 -1.3525196  
C -7.9979826 -4.1892698 -1.0167121

C 2.2304419 -2.3428187 0.5125402  
H 3.9382870 -1.4782605 -2.3070585  
H 2.3487193 -3.0930278 -3.2893604  
H 0.6822275 -4.2475648 -1.8522238  
H 0.6226497 -3.7706426 0.6060523  
H 2.1975222 -2.1437723 1.5871198  
C -1.2267521 -0.8780745 2.9279857  
H -0.6017396 -0.7400022 3.8153710  
H -2.1630968 -0.3147266 3.0729371  
N -1.6019317 -2.2701871 2.8760690  
C -0.9044067 -3.3721769 3.1935764  
C -1.7318846 -4.4246464 2.8504386  
N -2.8716239 -3.8954548 2.3485805  
N -2.7792232 -2.6044559 2.3521598  
H 0.0725730 -3.3274320 3.6488291  
C -1.5143112 -5.8631483 2.9373770  
C -0.2159974 -6.3886927 2.9634391  
C -0.0157353 -7.7650565 3.0132346  
C -1.1116339 -8.6290069 3.0390099  
C -2.4064746 -8.1096989 3.0139737  
C -2.6097926 -6.7340779 2.9610313  
H 0.6472181 -5.7167476 2.9239663  
H 1.0007617 -8.1678654 3.0308674  
H -0.9548803 -9.7103647 3.0835892  
H -3.2666832 -8.7844375 3.0387497  
H -3.6207984 -6.3214699 2.9359167  
Cu -3.0195771 -1.5851457 0.4282066  
P -4.2048373 0.3895418 0.4458611  
P -4.0066489 -3.2644492 -0.7931943  
C -3.2626225 -4.9066164 -0.6351457  
C -4.0069070 -6.0873353 -0.5524247  
C -3.3530974 -7.3158226 -0.4576615  
C -1.9602775 -7.3737042 -0.4412293  
C -1.2139892 -6.1966384 -0.5131463  
C -1.8645592 -4.9695325 -0.6051668  
H -5.0993113 -6.0504662 -0.5547412  
H -3.9393097 -8.2363559 -0.3882039  
H -1.4528782 -8.3378884 -0.3538699  
H -0.1215776 -6.2397237 -0.4805759  
H -1.2894431 -4.0389364 -0.6385383  
C -4.0345538 -3.0083335 -2.5995756  
C -4.3908578 -1.7399064 -3.0813536  
C -4.4722462 -1.4709893 -4.4435967  
C -4.1951386 -2.4883246 -5.3567347  
C -3.8166839 -3.7513146 -4.9013431  
C -3.7346571 -4.0084100 -3.5323548  
H -4.7440071 -0.4661969 -4.7759527  
H -4.2668759 -2.2885736 -6.4293865  
H -3.5915043 -4.5471614 -5.6160266  
H -3.4427757 -5.0017042 -3.1817201  
C -5.7608097 -3.4577134 -0.3926773  
C -6.6795797 -3.9893394 -1.3073617  
C -8.0208694 -4.1173054 -0.9557235

C -8.4501403 -3.7579070 0.2311746  
C -7.5536836 -3.2084818 1.1472689  
C -6.2061684 -3.0888865 0.8158396  
H -6.3091494 -4.3846164 -2.3402596  
H -8.7004036 -4.6199912 -1.7357866  
H -9.5089261 -3.8488439 0.4896338  
H -7.9067436 -2.8666339 2.1239095  
H -5.5009488 -2.6579288 1.5323424  
C -4.6212628 0.9926928 2.1680124  
C -4.7168465 0.0827799 3.2294689  
C -5.1006156 0.5164367 4.4989089  
C -5.3863275 1.8636229 4.7173513  
C -5.2940256 2.7766869 3.6643196  
C -4.9166880 2.3453029 2.3949447  
H -4.4951166 -0.9749892 3.0557940  
H -5.1810939 -0.2019672 5.3195595  
H -5.6890541 2.2050161 5.7113216  
H -5.5278180 3.8317737 3.8327886  
H -4.8549405 3.0634252 1.5723622  
C -5.7639484 0.2709017 -0.3517695  
C -5.8009465 -0.4036897 -1.5827166  
C -7.0037262 -0.7091229 -2.2087831  
C -8.1987487 -0.3239145 -1.6041178  
C -8.1893014 0.3657433 -0.3931243  
C -6.9778965 0.6546834 0.2298221  
O -4.5795445 -0.7247325 -2.1099918  
H -7.0061663 -1.2538443 -3.1552223  
H -9.1471229 -0.5675929 -2.0904115  
H -9.1283120 0.6698209 0.0755632  
H -6.9773132 1.1650589 1.1954531  
C -3.1911737 1.6962209 -0.2068877  
C -3.2661390 2.0026019 -1.5712450  
C -2.4046344 2.9428867 -2.1323903  
C -1.4631519 3.5969424 -1.3402387  
C -1.3857497 3.3060974 0.0220929  
C -2.2376015 2.3573884 0.5828465  
H -3.9988621 1.5015141 -2.2037778  
H -2.4776557 3.1730833 -3.1988364  
H -0.7987100 4.3403627 -1.7876943  
H -0.6585999 3.8242188 0.6554744  
H -2.1814979 2.1489791 1.6555741

**3 S<sub>0</sub> state:**

C 0.6854354 -0.1783649 -5.9174808  
C 1.3602629 -0.3423562 -4.7473871  
C -0.6854354 0.1783649 -5.9174808  
C -1.3602629 0.3423562 -4.7473871  
C 1.3721074 -0.3001606 -2.2971088  
C 0.6980034 -0.1621061 -3.5073867  
C -0.6980034 0.1621061 -3.5073867  
C -1.3721074 0.3001606 -2.2971088  
C -0.6978124 0.1515696 -1.0988343  
C 0.6978124 -0.1515696 -1.0988343

C -8.4549490 -3.7092341 0.3062643  
C -7.5447595 -3.1798469 1.2209388  
C -6.2019422 -3.0556289 0.8733871  
H -6.3488054 -4.2959276 -2.3038485  
H -8.7337605 -4.5340384 -1.6726976  
H -9.5101940 -3.8036621 0.5776721  
H -7.8832700 -2.8588107 2.2097068  
H -5.4847430 -2.6442712 1.5890810  
C -4.6682064 1.0440992 2.0698906  
C -4.8224179 0.1435447 3.1325538  
C -5.2284293 0.5969046 4.3877837  
C -5.4788154 1.9535380 4.5904646  
C -5.3293303 2.8567955 3.5355511  
C -4.9289377 2.4065849 2.2800190  
H -4.6245505 -0.9208863 2.9730767  
H -5.3519083 -0.1132872 5.2102065  
H -5.7979003 2.3104527 5.5737881  
H -5.5357373 3.9194934 3.6913645  
H -4.8227175 3.1169552 1.4554067  
C -5.7739407 0.2970226 -0.4531453  
C -5.7943457 -0.3897732 -1.6766024  
C -6.9873637 -0.6855792 -2.3252870  
C -8.1890040 -0.2790602 -1.7479769  
C -8.1952771 0.4204837 -0.5423834  
C -6.9936704 0.7006909 0.1026174  
O -4.5644924 -0.7315990 -2.1703410  
H -6.9785122 -1.2389520 -3.2666047  
H -9.1307741 -0.5138092 -2.2512388  
H -9.1396936 0.7405631 -0.0958761  
H -7.0049853 1.2214066 1.0626214  
C -3.1793621 1.6913869 -0.2916959  
C -3.2108867 1.9732532 -1.6637509  
C -2.3116907 2.8820921 -2.2171584  
C -1.3762876 3.5278136 -1.4106369  
C -1.3442497 3.2617127 -0.0403551  
C -2.2304382 2.3428193 0.5125329  
H -3.9382874 1.4782586 -2.3070604  
H -2.3487190 3.0930283 -3.2893626  
H -0.6822295 4.2475650 -1.8522226  
H -0.6226501 3.7706415 0.6060515  
H -2.1975217 2.1437712 1.5871221

**3 T<sub>1</sub> state:**

C 0.6810821 -0.1271171 -5.9602923  
C 1.3698575 -0.2483904 -4.7586109  
C -0.6810920 0.1271190 -5.9602754  
C -1.3698162 0.2483837 -4.7585939  
C 1.3777606 -0.2289014 -2.3075731  
C 0.7002876 -0.1186575 -3.5426550  
C -0.7003031 0.1186613 -3.5427148  
C -1.3777318 0.2288957 -2.3075265  
C -0.7028745 0.1323554 -1.0887710  
C 0.7028507 -0.1323543 -1.0887430

H 1.1961666 -0.3198928 -6.8656873  
H 2.4097506 -0.6214108 -4.7345557  
H -1.1961666 0.3198928 -6.8656873  
H -2.4097506 0.6214108 -4.7345557  
H 2.4289466 -0.5364423 -2.2833729  
H -2.4289466 0.5364423 -2.2833729  
N -1.3460781 0.3399567 0.0847155  
N 1.3460781 -0.3399567 0.0847155  
C -0.6838748 0.2109169 1.2107605  
C 0.6838748 -0.2109169 1.2107605  
Cu 3.4292924 -0.2014843 0.3229593  
P 4.9127584 -1.5046849 -0.7313198  
P 3.6615382 2.0518138 0.0026240  
C 2.4633014 2.9321382 1.0438907  
C 2.8525856 3.4696226 2.2774785  
C 1.9013226 4.0135089 3.1410651  
C 0.5520734 4.0272796 2.7867213  
C 0.1560941 3.4928274 1.5592653  
C 1.1021270 2.9431724 0.6973711  
H 3.9089172 3.4750253 2.5599435  
H 2.2258070 4.4518917 4.0895298  
H -0.1896209 4.4712254 3.4571521  
H -0.8984705 3.5075604 1.2662466  
H 0.7796707 2.5372202 -0.2664664  
C 3.3524615 2.6665376 -1.6796130  
C 3.8116689 1.8997861 -2.7635348  
C 3.5657186 2.2824518 -4.0778871  
C 2.8585734 3.4553329 -4.3336664  
C 2.4106880 4.2433241 -3.2738362  
C 2.6587132 3.8514950 -1.9598014  
H 3.9353048 1.6513741 -4.8888731  
H 2.6642044 3.7571593 -5.3664033  
H 1.8692764 5.1727554 -3.4702088  
H 2.3000639 4.4739700 -1.1360199  
C 5.2799652 2.7245344 0.4473458  
C 5.6653747 4.0235358 0.0897150  
C 6.9291825 4.4937286 0.4332471  
C 7.8149102 3.6719464 1.1346240  
C 7.4354838 2.3801233 1.4953148  
C 6.1706041 1.9063763 1.1512256  
H 4.9795998 4.6662623 -0.4699138  
H 7.2290662 5.5067292 0.1502235  
H 8.8095518 4.0428714 1.3983489  
H 8.1302742 1.7337725 2.0384418  
H 5.8727118 0.8872261 1.4180432  
C 5.8316156 -2.7262139 0.2331585  
C 5.9848880 -2.5075794 1.6083954  
C 6.7302380 -3.3970671 2.3803083  
C 7.3136822 -4.5159090 1.7854639  
C 7.1527761 -4.7453342 0.4177507  
C 6.4163637 -3.8534190 -0.3585727  
H 5.5128642 -1.6387350 2.0790516  
H 6.8518582 -3.2190792 3.4525850

H 1.2139900 -0.2312324 -6.9005985  
H 2.4362207 -0.4541607 -4.7491818  
H -1.2139892 0.2312341 -6.9006058  
H -2.4362385 0.4541641 -4.7491855  
H 2.4473605 -0.3994983 -2.2956405  
H -2.4473709 0.3995008 -2.2956447  
N -1.3613236 0.3086042 0.0704034  
N 1.3613309 -0.3086059 0.0704140  
C -0.6612242 0.1938950 1.2371384  
C 0.6612255 -0.1938936 1.2371343  
Cu 3.3962778 -0.1423373 0.3215677  
P 4.8767098 -1.4435991 -0.7409791  
P 3.6879310 2.1050275 0.0232215  
C 2.5164989 2.9948098 1.0854513  
C 2.9358839 3.5562660 2.2978376  
C 2.0033323 4.1021799 3.1805883  
C 0.6446426 4.0938436 2.8650649  
C 0.2193704 3.5369121 1.6570901  
C 1.1463999 2.9857160 0.7767872  
H 3.9995535 3.5761434 2.5502311  
H 2.3492018 4.5564021 4.1138215  
H -0.0830499 4.5365705 3.5515484  
H -0.8435823 3.5327877 1.3962858  
H 0.8009236 2.5551504 -0.1680389  
C 3.3570602 2.7292435 -1.6527962  
C 3.8154129 1.9788993 -2.7487659  
C 3.5755123 2.3853305 -4.0575157  
C 2.8692796 3.5623413 -4.2960561  
C 2.4135419 4.3293029 -3.2238291  
C 2.6589587 3.9159786 -1.9159496  
H 3.9509087 1.7699607 -4.8780985  
H 2.6819426 3.8841269 -5.3241736  
H 1.8707220 5.2608942 -3.4058155  
H 2.2986804 4.5240473 -1.0821102  
C 5.3219079 2.7626378 0.4316984  
C 5.7157802 4.0549257 0.0590275  
C 6.9919713 4.5114845 0.3741449  
C 7.8817281 3.6826903 1.0620148  
C 7.4935101 2.3979364 1.4383974  
C 6.2163304 1.9377600 1.1228961  
H 5.0262953 4.7035286 -0.4891686  
H 7.2980562 5.5193917 0.0799878  
H 8.8860132 4.0427852 1.3034136  
H 8.1910056 1.7465606 1.9720254  
H 5.9104636 0.9245465 1.4028771  
C 5.7723169 -2.6863395 0.2165609  
C 5.9423533 -2.4687456 1.5901534  
C 6.6716759 -3.3754662 2.3571130  
C 7.2216934 -4.5097159 1.7595959  
C 7.0433589 -4.7378369 0.3936930  
C 6.3230026 -3.8292229 -0.3781978  
H 5.4948202 -1.5885590 2.0633718  
H 6.8062176 -3.1985264 3.4280310

H 7.8951694 -5.2169134 2.3911980  
H 7.6065941 -5.6250345 -0.0473620  
H 6.2933197 -4.0355241 -1.4300936  
C 6.1913591 -0.4352706 -1.4418942  
C 5.7756325 0.6742812 -2.1950365  
C 6.6698155 1.6680072 -2.5778690  
C 8.0113363 1.5483885 -2.2168865  
C 8.4538405 0.4403351 -1.4965741  
C 7.5461561 -0.5442429 -1.1111111  
O 4.4467551 0.7058423 -2.5328929  
H 6.3182299 2.5311065 -3.1480661  
H 8.7165668 2.3307020 -2.5103373  
H 9.5082594 0.3454328 -1.2252395  
H 7.8878578 -1.3999065 -0.5231759  
C 4.1982216 -2.4377085 -2.1118824  
C 4.7278882 -2.4058236 -3.4056715  
C 4.0913309 -3.0941112 -4.4390926  
C 2.9255245 -3.8171556 -4.1872040  
C 2.3970009 -3.8597431 -2.8954078  
C 3.0286974 -3.1705635 -1.8646391  
H 5.6407476 -1.8383512 -3.6076489  
H 4.5126319 -3.0684835 -5.4483106  
H 2.4279357 -4.3526674 -5.0006527  
H 1.4825586 -4.4253413 -2.6941751  
H 2.6033224 -3.1842101 -0.8551500  
C -1.4640447 0.5093800 2.4004592  
Cu -3.4292924 0.2014843 0.3229593  
P -4.9127584 1.5046849 -0.7313198  
P -3.6615382 -2.0518138 0.0026240  
C -2.4633014 -2.9321382 1.0438907  
C -2.8525856 -3.4696226 2.2774785  
C -1.9013226 -4.0135089 3.1410651  
C -0.5520734 -4.0272796 2.7867213  
C -0.1560941 -3.4928274 1.5592653  
C -1.1021270 -2.9431724 0.6973711  
H -3.9089172 -3.4750253 2.5599435  
H -2.2258070 -4.4518917 4.0895298  
H 0.1896209 -4.4712254 3.4571521  
H 0.8984705 -3.5075604 1.2662466  
H -0.7796707 -2.5372202 -0.2664664  
C -3.3524615 -2.6665376 -1.6796130  
C -3.8116689 -1.8997861 -2.7635348  
C -3.5657186 -2.2824518 -4.0778871  
C -2.8585734 -3.4553329 -4.3336664  
C -2.4106880 -4.2433241 -3.2738362  
C -2.6587132 -3.8514950 -1.9598014  
H -3.9353048 -1.6513741 -4.8888731  
H -2.6642044 -3.7571593 -5.3664033  
H -1.8692764 -5.1727554 -3.4702088  
H -2.3000639 -4.4739700 -1.1360199  
C -5.2799652 -2.7245344 0.4473458  
C -5.6653747 -4.0235358 0.0897150  
C -6.9291825 -4.4937286 0.4332471

H 7.7903323 -5.2241340 2.3619512  
H 7.4708696 -5.6296832 -0.0732589  
H 6.1862106 -4.0098802 -1.4483135  
C 6.1701267 -0.4045556 -1.4667239  
C 5.7705372 0.7167694 -2.2110356  
C 6.6801462 1.6948330 -2.5967785  
C 8.0221539 1.5465399 -2.2484015  
C 8.4489939 0.4258840 -1.5379373  
C 7.5255451 -0.5422093 -1.1485244  
O 4.4393029 0.7751610 -2.5376607  
H 6.3400993 2.5683262 -3.1580685  
H 8.7401252 2.3166205 -2.5434902  
H 9.5037263 0.3089884 -1.2763182  
H 7.8549670 -1.4069525 -0.5667511  
C 4.1146592 -2.3591826 -2.1076570  
C 4.6159161 -2.3393031 -3.4129357  
C 3.9340459 -3.0025845 -4.4339521  
C 2.7497513 -3.6872643 -4.1590827  
C 2.2486129 -3.7174931 -2.8562456  
C 2.9254570 -3.0535154 -1.8371808  
H 5.5426232 -1.8015796 -3.6328360  
H 4.3348842 -2.9890685 -5.4517715  
H 2.2175513 -4.2034155 -4.9631335  
H 1.3197597 -4.2520228 -2.6365652  
H 2.5219111 -3.0553463 -0.8188037  
C -1.4596616 0.4922977 2.4130037  
Cu -3.3962779 0.1423364 0.3215675  
P -4.8767101 1.4436001 -0.7409773  
P -3.6879280 -2.1050247 0.0232238  
C -2.5165110 -2.9948052 1.0854469  
C -2.9358637 -3.5562781 2.2978576  
C -2.0033304 -4.1021633 3.1805549  
C -0.6446550 -4.0938398 2.8650588  
C -0.2193908 -3.5369109 1.6570923  
C -1.1463805 -2.9857199 0.7767905  
H -3.9995599 -3.5761421 2.5502301  
H -2.3492068 -4.5564082 4.1138335  
H 0.0830559 -4.5365752 3.5515522  
H 0.8435897 -3.5327867 1.3962828  
H -0.8009255 -2.5551499 -0.1680388  
C -3.3570651 -2.7292386 -1.6528102  
C -3.8153940 -1.9789284 -2.7487659  
C -3.5755187 -2.3853194 -4.0575021  
C -2.8692791 -3.5623394 -4.2960700  
C -2.4135305 -4.3293255 -3.2238318  
C -2.6589646 -3.9159682 -1.9159391  
H -3.9509084 -1.7699611 -4.8781003  
H -2.6819431 -3.8841263 -5.3241684  
H -1.8707280 -5.2608833 -3.4058139  
H -2.2986808 -4.5240493 -1.0821096  
C -5.3219170 -2.7626621 0.4316933  
C -5.7157972 -4.0549021 0.0590436  
C -6.9919682 -4.5114554 0.3741558

C -7.8149102 -3.6719464 1.1346240  
C -7.4354838 -2.3801233 1.4953148  
C -6.1706041 -1.9063763 1.1512256  
H -4.9795998 -4.6662623 -0.4699138  
H -7.2290662 -5.5067292 0.1502235  
H -8.8095518 -4.0428714 1.3983489  
H -8.1302742 -1.7337725 2.0384418  
H -5.8727118 -0.8872261 1.4180432  
C -5.8316156 2.7262139 0.2331585  
C -5.9848880 2.5075794 1.6083954  
C -6.7302380 3.3970671 2.3803083  
C -7.3136822 4.5159090 1.7854639  
C -7.1527761 4.7453342 0.4177507  
C -6.4163637 3.8534190 -0.3585727  
H -5.5128642 1.6387350 2.0790516  
H -6.8518582 3.2190792 3.4525850  
H -7.8951694 5.2169134 2.3911980  
H -7.6065941 5.6250345 -0.0473620  
H -6.2933197 4.0355241 -1.4300936  
C -6.1913591 0.4352706 -1.4418942  
C -5.7756325 -0.6742812 -2.1950365  
C -6.6698155 -1.6680072 -2.5778690  
C -8.0113363 -1.5483885 -2.2168865  
C -8.4538405 -0.4403351 -1.4965741  
C -7.5461561 0.5442429 -1.1111111  
O -4.4467551 -0.7058423 -2.5328929  
H -6.3182299 -2.5311065 -3.1480661  
H -8.7165668 -2.3307020 -2.5103373  
H -9.5082594 -0.3454328 -1.2252395  
H -7.8878578 1.3999065 -0.5231759  
C -4.1982216 2.4377085 -2.1118824  
C -4.7278882 2.4058236 -3.4056715  
C -4.0913309 3.0941112 -4.4390926  
C -2.9255245 3.8171556 -4.1872040  
C -2.3970009 3.8597431 -2.8954078  
C -3.0286974 3.1705635 -1.8646391  
H -5.6407476 1.8383512 -3.6076489  
H -4.5126319 3.0684835 -5.4483106  
H -2.4279357 4.3526674 -5.0006527  
H -1.4825586 4.4253413 -2.6941751  
H -2.6033224 3.1842101 -0.8551500  
C 1.4640447 -0.5093800 2.4004592  
N 2.8214339 -0.4546625 2.2983005  
N 3.3678108 -0.7377250 3.4317940  
N 2.3812552 -1.0184797 4.2743850  
C 1.1804070 -0.9051825 3.6844528  
H 0.2677188 -1.1186175 4.2159886  
C 2.6384784 -1.1769607 5.6919930  
H 2.1504672 -2.1019254 6.0373323  
H 3.7278241 -1.3086400 5.7858319  
C 2.1503913 0.0131035 6.4867434  
C 1.8705486 -0.1469298 7.8457754  
C 1.4618413 0.9396124 8.6160881

C -7.8817127 -3.6827293 1.0619922  
C -7.4935862 -2.3979120 1.4384374  
C -6.2162665 -1.9377214 1.1228856  
H -5.0262841 -4.7035376 -0.4891773  
H -7.2980604 -5.5194041 0.0799843  
H -8.8860147 -4.0427826 1.3034160  
H -8.1909823 -1.7465799 1.9720086  
H -5.9104735 -0.9245657 1.4028733  
C -5.7723158 2.6863272 0.2165911  
C -5.9423437 2.4687445 1.5901144  
C -6.6716825 3.3754633 2.3571493  
C -7.2216894 4.5097264 1.7595515  
C -7.0433667 4.7378335 0.3937344  
C -6.3229990 3.8292257 -0.3782215  
H -5.4948183 1.5885564 2.0633756  
H -6.8062157 3.1985285 3.4280176  
H -7.7903371 5.2241376 2.3619569  
H -7.4708713 5.6296868 -0.0732634  
H -6.1862111 4.0098788 -1.4483068  
C -6.1701057 0.4045451 -1.4667370  
C -5.7705461 -0.7167715 -2.2110340  
C -6.6801184 -1.6948215 -2.5967782  
C -8.0221774 -1.5465876 -2.2484209  
C -8.4490436 -0.4258749 -1.5379230  
C -7.5255460 0.5422520 -1.1484984  
O -4.4393169 -0.7751464 -2.5376569  
H -6.3401017 -2.5683261 -3.1580675  
H -8.7401098 -2.3166023 -2.5434828  
H -9.5037008 -0.3089920 -1.2763246  
H -7.8549618 1.4069346 -0.5667636  
C -4.1146690 2.3591766 -2.1076589  
C -4.6159108 2.3393060 -3.4129364  
C -3.9340442 3.0025848 -4.4339474  
C -2.7497494 3.6872585 -4.1590582  
C -2.2486434 3.7174765 -2.8562562  
C -2.9254396 3.0535289 -1.8371931  
H -5.5426245 1.8015771 -3.6328356  
H -4.3348860 2.9890673 -5.4517744  
H -2.2175477 4.2034211 -4.9631424  
H -1.3197477 4.2520296 -2.6365621  
H -2.5219107 3.0553446 -0.8188002  
C 1.4596629 -0.4922990 2.4130028  
N 2.8154565 -0.4181886 2.3050345  
N 3.3752680 -0.6979178 3.4339958  
N 2.3990501 -0.9937679 4.2814116  
C 1.1924534 -0.8970480 3.6982174  
H 0.2858339 -1.1178901 4.2371304  
C 2.6652562 -1.1395330 5.6982552  
H 2.1929838 -2.0689163 6.0534444  
H 3.7568798 -1.2536181 5.7886867  
C 2.1621376 0.0495253 6.4855059  
C 1.8687932 -0.1066153 7.8420478  
C 1.4438571 0.9801802 8.6034939



|   |            |            |           |
|---|------------|------------|-----------|
| C | 1.3066369  | 2.1952494  | 8.0309815 |
| C | 1.5758528  | 2.3597023  | 6.6726193 |
| C | 2.0047754  | 1.2776346  | 5.9042555 |
| H | 1.9736642  | -1.1323576 | 8.3106489 |
| H | 1.2567497  | 0.8014678  | 9.6813365 |
| H | 0.9860161  | 3.0481014  | 8.6358898 |
| H | 1.4711469  | 3.3446197  | 6.2082450 |
| H | 2.2456035  | 1.4368300  | 4.8476139 |
| N | -2.8214339 | 0.4546625  | 2.2983005 |
| N | -3.3678108 | 0.7377250  | 3.4317940 |
| N | -2.3812552 | 1.0184797  | 4.2743850 |
| C | -1.1804070 | 0.9051825  | 3.6844528 |
| H | -0.2677188 | 1.1186175  | 4.2159886 |
| C | -2.6384784 | 1.1769607  | 5.6919930 |
| H | -2.1504672 | 2.1019254  | 6.0373323 |
| H | -3.7278241 | 1.3086400  | 5.7858319 |
| C | -2.1503913 | -0.0131035 | 6.4867434 |
| C | -1.8705486 | 0.1469298  | 7.8457754 |
| C | -1.4618413 | -0.9396124 | 8.6160881 |
| C | -1.3066369 | -2.1952494 | 8.0309815 |
| C | -1.5758528 | -2.3597023 | 6.6726193 |
| C | -2.0047754 | -1.2776346 | 5.9042555 |
| H | -1.9736642 | 1.1323576  | 8.3106489 |
| H | -1.2567497 | -0.8014678 | 9.6813365 |
| H | -0.9860161 | -3.0481014 | 8.6358898 |
| H | -1.4711469 | -3.3446197 | 6.2082450 |
| H | -2.2456035 | -1.4368300 | 4.8476139 |

**4 S<sub>0</sub> state:**

|   |            |            |            |
|---|------------|------------|------------|
| C | 0.0629814  | 0.5448324  | -5.1138637 |
| C | 0.5367251  | 1.1324212  | -3.9827934 |
| C | -0.6373406 | -0.6842013 | -5.0464722 |
| C | -0.8457909 | -1.2946031 | -3.8494558 |
| C | 0.8160632  | 1.1144899  | -1.5407032 |
| C | 0.3412845  | 0.5294973  | -2.7121741 |
| C | -0.3675124 | -0.7159682 | -2.6442881 |
| C | -0.5695292 | -1.3227269 | -1.4071892 |
| C | -0.0931182 | -0.7333410 | -0.2469778 |
| C | 0.6104629  | 0.5058817  | -0.3122452 |
| H | 0.2187782  | 1.0169489  | -6.0797248 |
| H | 1.0741223  | 2.0763147  | -4.0291647 |
| H | -1.0089003 | -1.1368683 | -5.9613810 |
| H | -1.3838970 | -2.2374407 | -3.7915175 |
| H | 1.3533129  | 2.0582283  | -1.5701831 |
| H | -1.1070453 | -2.2637767 | -1.3303873 |
| N | -0.2977965 | -1.3421881 | 0.9554973  |
| N | 1.0822598  | 1.0956107  | 0.8239840  |
| C | 0.1532194  | -0.7545840 | 2.0140221  |
| C | 0.8677043  | 0.5010983  | 1.9576910  |
| C | 1.3735702  | 1.1473326  | 3.2061638  |
| H | 0.5399987  | 1.4243958  | 3.8762661  |
| H | 2.0359482  | 0.4696403  | 3.7730747  |
| C | -0.0524049 | -1.4169880 | 3.3550003  |

|   |            |            |           |
|---|------------|------------|-----------|
| C | 1.2860294  | 2.2321693  | 8.0114106 |
| C | 1.5681671  | 2.3925892  | 6.6549894 |
| C | 2.0127941  | 1.3105312  | 5.8958659 |
| H | 1.9731215  | -1.0895795 | 8.3118127 |
| H | 1.2278995  | 0.8449712  | 9.6670183 |
| H | 0.9529049  | 3.0853948  | 8.6091494 |
| H | 1.4602433  | 3.3740340  | 6.1840756 |
| H | 2.2604669  | 1.4661741  | 4.8402836 |
| N | -2.8154741 | 0.4181933  | 2.3050524 |
| N | -3.3752678 | 0.6979094  | 3.4339625 |
| N | -2.3990342 | 0.9937751  | 4.2814419 |
| C | -1.1924451 | 0.8970497  | 3.6982100 |
| H | -0.2858370 | 1.1178910  | 4.2371307 |
| C | -2.6652967 | 1.1395109  | 5.6982345 |
| H | -2.1929729 | 2.0689317  | 6.0534498 |
| H | -3.7568570 | 1.2536188  | 5.7886872 |
| C | -2.1621333 | -0.0495236 | 6.4855093 |
| C | -1.8687946 | 0.1066120  | 7.8420447 |
| C | -1.4438583 | -0.9801808 | 8.6034897 |
| C | -1.2860297 | -2.2321656 | 8.0114109 |
| C | -1.5681675 | -2.3925840 | 6.6549921 |
| C | -2.0127953 | -1.3105324 | 5.8958685 |
| H | -1.9731223 | 1.0895804  | 8.3118139 |
| H | -1.2278995 | -0.8449712 | 9.6670186 |
| H | -0.9529041 | -3.0853972 | 8.6091510 |
| H | -1.4602431 | -3.3740337 | 6.1840757 |
| H | -2.2604675 | -1.4661738 | 4.8402835 |

**4 T<sub>1</sub> state:**

|   |            |            |            |
|---|------------|------------|------------|
| C | 0.1020587  | 0.8638700  | -5.3152862 |
| C | -0.2716551 | 1.3226466  | -4.0434516 |
| C | 0.7875587  | -0.3195139 | -5.4413479 |
| C | 1.1125856  | -1.0657016 | -4.2987674 |
| C | -0.3290087 | 1.0467249  | -1.6035591 |
| C | 0.0398932  | 0.6004249  | -2.8995304 |
| C | 0.7534838  | -0.6299096 | -3.0306451 |
| C | 1.0745839  | -1.3668421 | -1.8606113 |
| C | 0.7096848  | -0.9173479 | -0.5628434 |
| C | -0.0086281 | 0.3092318  | -0.4310466 |
| H | -0.1533037 | 1.4482537  | -6.1939078 |
| H | -0.8145210 | 2.2593250  | -3.9426285 |
| H | 1.0812015  | -0.6832362 | -6.4213065 |
| H | 1.6556722  | -2.0022763 | -4.3996367 |
| H | -0.8753195 | 1.9778042  | -1.4804462 |
| H | 1.6206804  | -2.3029266 | -1.9388913 |
| N | 1.0392483  | -1.6281938 | 0.5073176  |
| N | -0.3815850 | 0.7675515  | 0.7570574  |
| C | 0.6633269  | -1.1446061 | 1.7074304  |
| C | -0.0533612 | 0.0357019  | 1.8411375  |
| C | -0.4952232 | 0.5638793  | 3.1671024  |
| H | -0.9821528 | -0.2140215 | 3.7786261  |
| H | 0.3644863  | 0.9465002  | 3.7471983  |
| C | 1.0364121  | -1.9931572 | 2.8878654  |

|   |            |            |           |
|---|------------|------------|-----------|
| H | 0.9228412  | -1.7442129 | 3.7564316 |
| H | -0.4776291 | -0.7007972 | 4.0733284 |
| N | -0.9566669 | -2.5293596 | 3.3245330 |
| C | -0.8126509 | -3.7312893 | 2.7416370 |
| C | -1.9962004 | -4.3823564 | 2.9967557 |
| N | -2.7807355 | -3.5305622 | 3.7138018 |
| N | -2.1561177 | -2.4225590 | 3.9047833 |
| H | 0.0777564  | -4.0019988 | 2.1986085 |
| C | -2.4365298 | -5.7210594 | 2.6182446 |
| C | -1.6306565 | -6.5537340 | 1.8295666 |
| C | -2.0605493 | -7.8291910 | 1.4744560 |
| C | -3.3052956 | -8.2937486 | 1.9005749 |
| C | -4.1145682 | -7.4702838 | 2.6842683 |
| C | -3.6861673 | -6.1949177 | 3.0413729 |
| H | -0.6545227 | -6.1995733 | 1.4853916 |
| H | -1.4183652 | -8.4656068 | 0.8581726 |
| H | -3.6439666 | -9.2958332 | 1.6214025 |
| H | -5.0926100 | -7.8260668 | 3.0222207 |
| H | -4.3146311 | -5.5449253 | 3.6543709 |
| H | 1.9319296  | 2.0561756  | 2.9417756 |

5 S<sub>0</sub> state:

|   |            |            |            |
|---|------------|------------|------------|
| C | 0.1499296  | 0.6921241  | -6.0185369 |
| C | 0.2955187  | 1.3672619  | -4.8475096 |
| C | -0.1499296 | -0.6921241 | -6.0185369 |
| C | -0.2955187 | -1.3672619 | -4.8475096 |
| C | 0.2935347  | 1.3739660  | -2.3906129 |
| C | 0.1508264  | 0.7016401  | -3.6016547 |
| C | -0.1508264 | -0.7016401 | -3.6016547 |
| C | -0.2935347 | -1.3739660 | -2.3906129 |
| C | -0.1478513 | -0.6981300 | -1.1894863 |
| C | 0.1478513  | 0.6981300  | -1.1894863 |
| H | 0.2631904  | 1.2125295  | -6.9652544 |
| H | 0.5260134  | 2.4295608  | -4.8418660 |
| H | -0.2631904 | -1.2125295 | -6.9652544 |
| H | -0.5260134 | -2.4295608 | -4.8418660 |
| H | 0.5240560  | 2.4352921  | -2.3671827 |
| H | -0.5240560 | -2.4352921 | -2.3671827 |
| N | -0.2866997 | -1.3689722 | -0.0117945 |
| N | 0.2866997  | 1.3689722  | -0.0117945 |
| C | -0.1506638 | -0.7047990 | 1.0886385  |
| C | 0.1506638  | 0.7047990  | 1.0886385  |
| C | 0.2864269  | 1.4429874  | 2.4005341  |
| H | -0.7108915 | 1.5689437  | 2.8575746  |
| H | 0.9045006  | 0.8674912  | 3.1052520  |
| N | 0.9207117  | 2.7221389  | 2.2768299  |
| C | 0.4519892  | 3.8613265  | 1.7395414  |
| C | 1.5028573  | 4.7428615  | 1.8312419  |
| N | 2.5399307  | 4.0778104  | 2.4126018  |
| N | 2.1889983  | 2.8686785  | 2.6736856  |
| H | -0.5451090 | 3.9381231  | 1.3380654  |
| C | 1.6021258  | 6.1385207  | 1.4166647  |
| C | 0.5340161  | 6.7826025  | 0.7771135  |

|   |            |            |           |
|---|------------|------------|-----------|
| H | 1.9379015  | -2.5689536 | 2.6344483 |
| H | 1.2263852  | -1.3948119 | 3.7876981 |
| N | -0.0246879 | -2.9139826 | 3.2494235 |
| C | -0.5728133 | -3.8909838 | 2.5060423 |
| C | -1.5554740 | -4.4231749 | 3.3097327 |
| N | -1.5390281 | -3.7327651 | 4.4821300 |
| N | -0.6213563 | -2.8280682 | 4.4386213 |
| H | -0.2262822 | -4.1037674 | 1.5068847 |
| C | -2.4916748 | -5.5148392 | 3.0601707 |
| C | -2.5227318 | -6.1766646 | 1.8250561 |
| C | -3.4205833 | -7.2163118 | 1.5991603 |
| C | -4.3035333 | -7.6115725 | 2.6045825 |
| C | -4.2794341 | -6.9572766 | 3.8368608 |
| C | -3.3823240 | -5.9177956 | 4.0649747 |
| H | -1.8379901 | -5.8733223 | 1.0276764 |
| H | -3.4319604 | -7.7216102 | 0.6287094 |
| H | -5.0095469 | -8.4282994 | 2.4275034 |
| H | -4.9683078 | -7.2609252 | 4.6309707 |
| H | -3.3574414 | -5.4013003 | 5.0271472 |
| H | -1.1974738 | 1.3943539  | 3.0072515 |

5 T<sub>1</sub> state:

|   |            |            |            |
|---|------------|------------|------------|
| C | -0.4525939 | 0.5166028  | -6.8663924 |
| C | -0.9132610 | 1.0431299  | -5.6516561 |
| C | 0.4527759  | -0.5171266 | -6.8662205 |
| C | 0.9134517  | -1.0427890 | -5.6511976 |
| C | -0.9243556 | 1.0545493  | -3.1956689 |
| C | -0.4703016 | 0.5373435  | -4.4368524 |
| C | 0.4700759  | -0.5366246 | -4.4367455 |
| C | 0.9239270  | -1.0540100 | -3.1956621 |
| C | 0.4726649  | -0.5361771 | -1.9534017 |
| C | -0.4730954 | 0.5365128  | -1.9533697 |
| H | -0.8148330 | 0.9297952  | -7.8027031 |
| H | -1.6295680 | 1.8610907  | -5.6520810 |
| H | 0.8149945  | -0.9309270 | -7.8023042 |
| H | 1.6301462  | -1.8603871 | -5.6507936 |
| H | -1.6433296 | 1.8688150  | -3.1736551 |
| H | 1.6428202  | -1.8683126 | -3.1737803 |
| N | 0.9320588  | -1.0426587 | -0.8169092 |
| N | -0.9324346 | 1.0427310  | -0.8167502 |
| C | 0.4676591  | -0.5086624 | 0.3312730  |
| C | -0.4679282 | 0.5085621  | 0.3313502  |
| C | -1.0082598 | 1.1302015  | 1.5896425  |
| H | -2.0245057 | 1.4929308  | 1.3879577  |
| H | -1.0386768 | 0.4204067  | 2.4260478  |
| N | -0.1957157 | 2.2569588  | 2.0031048  |
| C | -0.1851668 | 3.5075460  | 1.5107010  |
| C | 0.8589698  | 4.1247233  | 2.1616065  |
| N | 1.4155666  | 3.2058929  | 2.9966485  |
| N | 0.7827534  | 2.0872328  | 2.8914136  |
| H | -0.8950603 | 3.8303894  | 0.7661562  |
| C | 1.3578097  | 5.4924473  | 2.0596269  |
| C | 0.8150399  | 6.3946907  | 1.1344342  |

|   |            |            |            |
|---|------------|------------|------------|
| C | 0.6398215  | 8.1142136  | 0.3855860  |
| C | 1.8166659  | 8.8242965  | 0.6257031  |
| C | 2.8851282  | 8.1899072  | 1.2605273  |
| C | 2.7811646  | 6.8586811  | 1.6537520  |
| H | -0.3930129 | 6.2360876  | 0.5803686  |
| H | -0.2038964 | 8.6016477  | -0.1121061 |
| H | 1.9004848  | 9.8707955  | 0.3181675  |
| H | 3.8116783  | 8.7393238  | 1.4526559  |
| H | 3.6135358  | 6.3561265  | 2.1515005  |
| C | -0.2864269 | -1.4429874 | 2.4005341  |
| H | 0.7108915  | -1.5689437 | 2.8575746  |
| H | -0.9045006 | -0.8674912 | 3.1052520  |
| N | -0.9207117 | -2.7221389 | 2.2768299  |
| C | -0.4519892 | -3.8613265 | 1.7395414  |
| C | -1.5028573 | -4.7428615 | 1.8312419  |
| N | -2.5399307 | -4.0778104 | 2.4126018  |
| N | -2.1889983 | -2.8686785 | 2.6736856  |
| H | 0.5451090  | -3.9381231 | 1.3380654  |
| C | -1.6021258 | -6.1385207 | 1.4166647  |
| C | -0.5340161 | -6.7826025 | 0.7771135  |
| C | -0.6398215 | -8.1142136 | 0.3855860  |
| C | -1.8166659 | -8.8242965 | 0.6257031  |
| C | -2.8851282 | -8.1899072 | 1.2605273  |
| C | -2.7811646 | -6.8586811 | 1.6537520  |
| H | 0.3930129  | -6.2360876 | 0.5803686  |
| H | 0.2038964  | -8.6016477 | -0.1121061 |
| H | -1.9004848 | -9.8707955 | 0.3181675  |
| H | -3.8116783 | -8.7393238 | 1.4526559  |
| H | -3.6135358 | -6.3561265 | 2.1515005  |

**6 S<sub>0</sub> state:**

|   |            |            |            |
|---|------------|------------|------------|
| C | 0.0045840  | 0.7080611  | -4.4330326 |
| C | 0.0088369  | 1.3975522  | -3.2608073 |
| C | -0.0045840 | -0.7080611 | -4.4330326 |
| C | -0.0088369 | -1.3975522 | -3.2608073 |
| C | 0.0160709  | 1.4026563  | -0.8022753 |
| C | 0.0040725  | 0.7174133  | -2.0144098 |
| C | -0.0040725 | -0.7174133 | -2.0144098 |
| C | -0.0160709 | -1.4026563 | -0.8022753 |
| C | -0.0166165 | -0.7137211 | 0.4015413  |
| C | 0.0166165  | 0.7137211  | 0.4015413  |
| H | 0.0082007  | 1.2413676  | -5.3794471 |
| H | 0.0164135  | 2.4847544  | -3.2551547 |
| H | -0.0082007 | -1.2413676 | -5.3794471 |
| H | -0.0164135 | -2.4847544 | -3.2551547 |
| H | 0.0419612  | 2.4885823  | -0.7794215 |
| H | -0.0419612 | -2.4885823 | -0.7794215 |
| N | -0.1031151 | -1.3985665 | 1.5738754  |
| N | 0.1031151  | 1.3985665  | 1.5738754  |
| C | -0.0949286 | -0.7188630 | 2.6838367  |
| C | 0.0949286  | 0.7188630  | 2.6838367  |
| C | -0.3378111 | -1.4635130 | 3.9158576  |
| C | 0.3378111  | 1.4635130  | 3.9158576  |

|   |            |            |           |
|---|------------|------------|-----------|
| C | 1.2991121  | 7.6967681  | 1.0448056 |
| C | 2.3356264  | 8.1184876  | 1.8782172 |
| C | 2.8822283  | 7.2259669  | 2.8011551 |
| C | 2.3989590  | 5.9238734  | 2.8932298 |
| H | 0.0050880  | 6.0745518  | 0.4724093 |
| H | 0.8641759  | 8.3879324  | 0.3165660 |
| H | 2.7166671  | 9.1415826  | 1.8082227 |
| H | 3.6949838  | 7.5486269  | 3.4589297 |
| H | 2.8209492  | 5.2202470  | 3.6143582 |
| C | 1.0082908  | -1.1301982 | 1.5894900 |
| H | 2.0248706  | -1.4920560 | 1.3879627 |
| H | 1.0380006  | -0.4205186 | 2.4260136 |
| N | 0.1963106  | -2.2573401 | 2.0030008 |
| C | 0.1856728  | -3.5081254 | 1.5110444 |
| C | -0.8585955 | -4.1249209 | 2.1621641 |
| N | -1.4150853 | -3.2057931 | 2.9968910 |
| N | -0.7821660 | -2.0872603 | 2.8912464 |
| H | 0.8957444  | -3.8317166 | 0.7669680 |
| C | -1.3578672 | -5.4924733 | 2.0602255 |
| C | -0.8151824 | -6.3945467 | 1.1348595 |
| C | -1.2992632 | -7.6965633 | 1.0448231 |
| C | -2.3358418 | -8.1184317 | 1.8780171 |
| C | -2.8824070 | -7.2260833 | 2.8011619 |
| C | -2.3991824 | -5.9239683 | 2.8936164 |
| H | -0.0051765 | -6.0742574 | 0.4730214 |
| H | -0.8642977 | -8.3876233 | 0.3165209 |
| H | -2.7167542 | -9.1415481 | 1.8075123 |
| H | -3.6951061 | -7.5489410 | 3.4588878 |
| H | -2.8213820 | -5.2205487 | 3.6148602 |

**6 T<sub>1</sub> state:**

|   |            |            |            |
|---|------------|------------|------------|
| C | -0.0626808 | 0.6844721  | -4.3662786 |
| C | -0.1249477 | 1.3803834  | -3.1516132 |
| C | 0.0626852  | -0.6844634 | -4.3662757 |
| C | 0.1249485  | -1.3803720 | -3.1516143 |
| C | -0.1101996 | 1.3981796  | -0.6936323 |
| C | -0.0629390 | 0.7111791  | -1.9367252 |
| C | 0.0629473  | -0.7111675 | -1.9367262 |
| C | 0.1102002  | -1.3981886 | -0.6936335 |
| C | 0.0359680  | -0.7144939 | 0.5463220  |
| C | -0.0359624 | 0.7144936  | 0.5463116  |
| H | -0.1130676 | 1.2317292  | -5.3027021 |
| H | -0.2222121 | 2.4634099  | -3.1509681 |
| H | 0.1130691  | -1.2317152 | -5.3027058 |
| H | 0.2222183  | -2.4634017 | -3.1509738 |
| H | -0.1772465 | 2.4825187  | -0.6724947 |
| H | 0.1772430  | -2.4825072 | -0.6725025 |
| N | -0.0024220 | -1.3955702 | 1.6814881  |
| N | 0.0024283  | 1.3955654  | 1.6814899  |
| C | -0.0583327 | -0.6948601 | 2.8350702  |
| C | 0.0583382  | 0.6948579  | 2.8350700  |
| C | -0.2905153 | -1.4887723 | 4.0314370  |
| C | 0.2905209  | 1.4887719  | 4.0314417  |

C -0.0580411 2.7365705 4.2379497  
N 0.4787391 2.9497787 5.4492834  
N 1.1881333 1.8885943 5.8509826  
N 1.1028220 0.9898670 4.9338726  
H -0.6503769 3.4697179 3.7153959  
C 0.3841416 4.1255905 6.2867470  
H -0.6645862 4.2694043 6.5932714  
H 0.9687359 3.8830024 7.1878934  
C 0.9096614 5.3642063 5.6073623  
C 2.1698255 5.3553209 4.9982997  
C 2.6621360 6.5024808 4.3826274  
C 1.9020569 7.6737549 4.3707310  
C 0.6465875 7.6895790 4.9743457  
C 0.1523569 6.5370523 5.5863886  
H 2.7656032 4.4367459 5.0034375  
H 3.6473961 6.4832999 3.9076200  
H 2.2897729 8.5745282 3.8858384  
H 0.0428766 8.6018766 4.9646186  
H -0.8379456 6.5501547 6.0537771  
C 0.0580411 -2.7365705 4.2379497  
N -0.4787391 -2.9497787 5.4492834  
N -1.1881333 -1.8885943 5.8509826  
N -1.1028220 -0.9898670 4.9338726  
H 0.6503769 -3.4697179 3.7153959  
C -0.3841416 -4.1255905 6.2867470  
H 0.6645862 -4.2694043 6.5932714  
H -0.9687359 -3.8830024 7.1878934  
C -0.9096614 -5.3642063 5.6073623  
C -2.1698255 -5.3553209 4.9982997  
C -2.6621360 -6.5024808 4.3826274  
C -1.9020569 -7.6737549 4.3707310  
C -0.6465875 -7.6895790 4.9743457  
C -0.1523569 -6.5370523 5.5863886  
H -2.7656032 -4.4367459 5.0034375  
H -3.6473961 -6.4832999 3.9076200  
H -2.2897729 -8.5745282 3.8858384  
H -0.0428766 -8.6018766 4.9646186  
H 0.8379456 -6.5501547 6.0537771

C -0.0983001 2.7822787 4.2799117  
N 0.4178058 3.0556448 5.4887047  
N 1.1109025 2.0105330 5.9580135  
N 1.0361481 1.0664544 5.0878777  
H -0.6720359 3.4917909 3.7067558  
C 0.3282358 4.2765653 6.2566809  
H -0.7240493 4.4606565 6.5282000  
H 0.8844240 4.0723872 7.1851858  
C 0.8989717 5.4665384 5.5277590  
C 2.1537164 5.3854686 4.9130430  
C 2.6888291 6.4903594 4.2567830  
C 1.9778197 7.6910440 4.2090122  
C 0.7275410 7.7783760 4.8174488  
C 0.1902443 6.6682482 5.4700342  
H 2.7110887 4.4437184 4.9459002  
H 3.6693928 6.4144799 3.7776865  
H 2.3991531 8.5583794 3.6921473  
H 0.1614198 8.7137619 4.7794912  
H -0.7963319 6.7375069 5.9404487  
C 0.0982865 -2.7822908 4.2799012  
N -0.4178066 -3.0556484 5.4887016  
N -1.1108925 -2.0105250 5.9580183  
N -1.0361324 -1.0664478 5.0878730  
H 0.6720115 -3.4918091 3.7067486  
C -0.3282414 -4.2765623 6.2566875  
H 0.7240533 -4.4606601 6.5281980  
H -0.8844244 -4.0723888 7.1851897  
C -0.8989806 -5.4665323 5.5277641  
C -2.1537161 -5.3854711 4.9130469  
C -2.6888324 -6.4903660 4.2567845  
C -1.9778221 -7.6910472 4.2090263  
C -0.7275415 -7.7783753 4.8174605  
C -0.1902451 -6.6682547 5.4700374  
H -2.7110934 -4.4437162 4.9458970  
H -3.6693959 -6.4144860 3.7776889  
H -2.3991564 -8.5583896 3.6921570  
H -0.1614192 -8.7137670 4.7795039  
H 0.7963318 -6.7375028 5.9404569

## 5.2 Calculated electronic spectra and natural transition orbitals (NTOs)

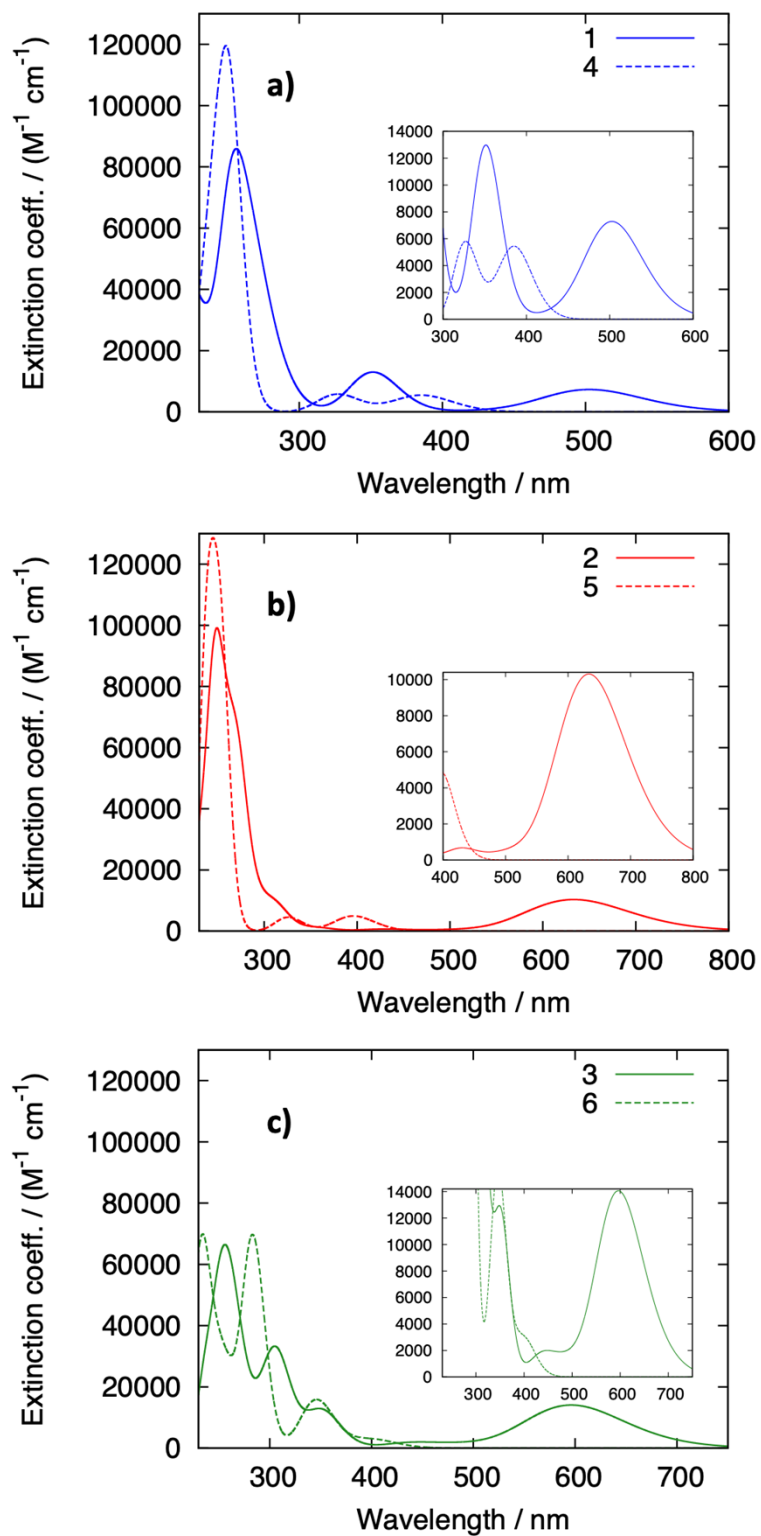

**Figure S5.1.** Absorption spectra (FWHM = 0.4 eV) of compounds 1-6 calculated using PBE0 evGW-BSE/def2-TZVP at the optimized  $S_0$  geometries. Inset: zoom-in in the range of MLCT.

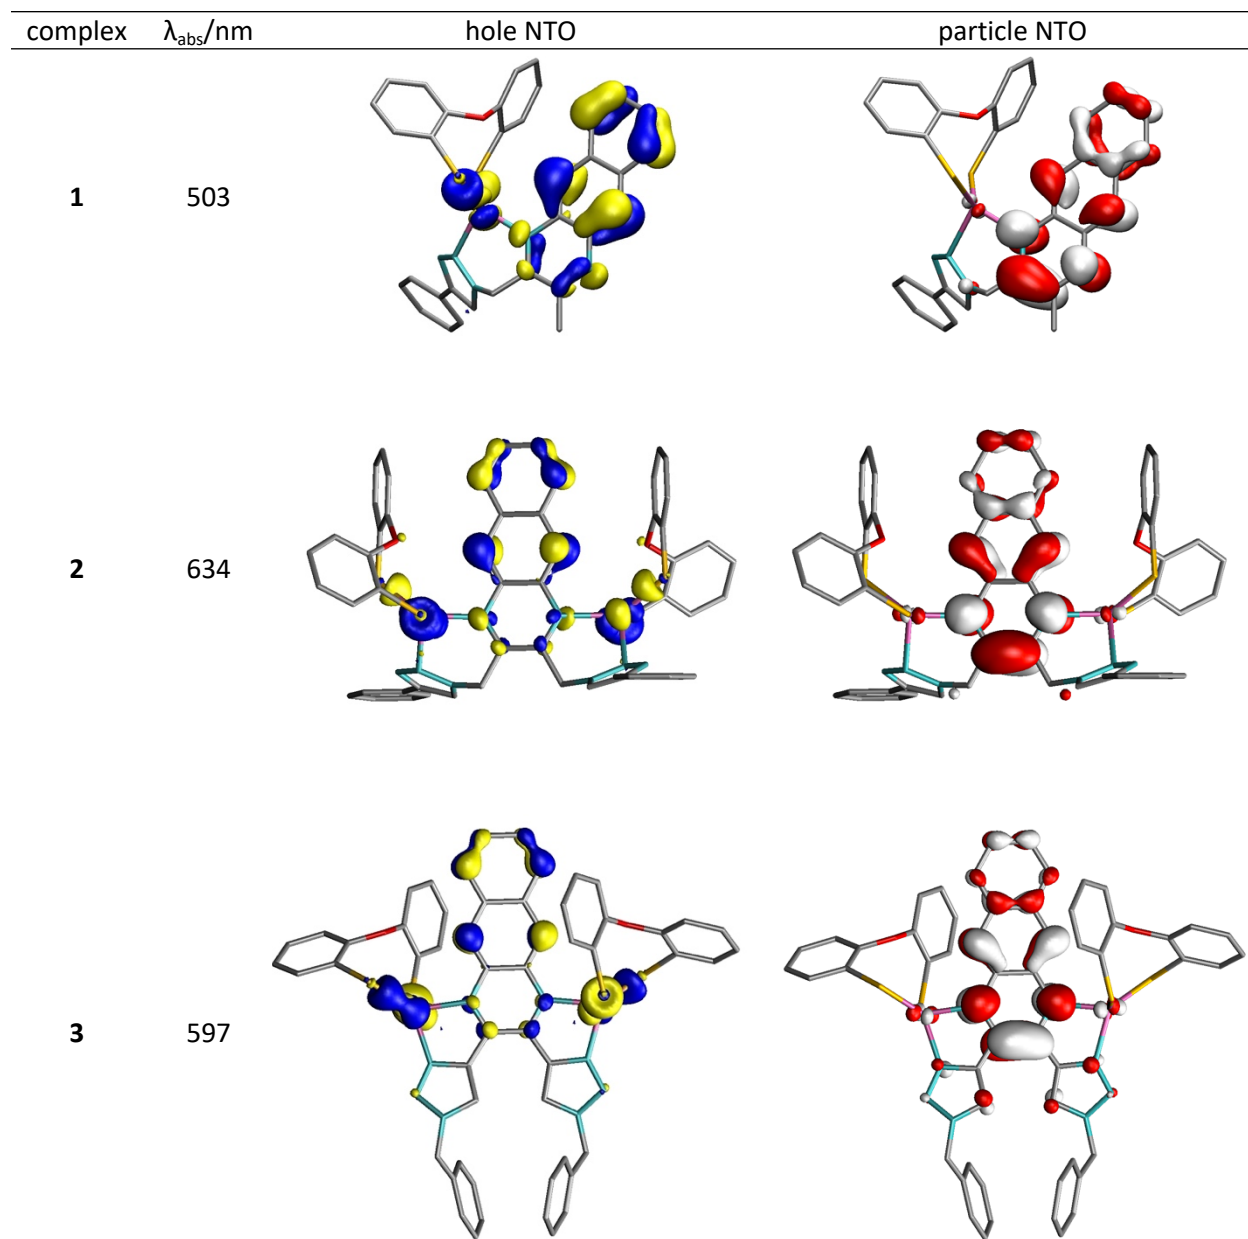

**Figure S5.2.** Dominating occupied (blue/yellow) and virtual (red/white) natural transition orbitals (NTOs, iso-value:  $\pm 0.04a_0^{-3/2}$ ) of the MLCT excitation ( $S_1$ ) in the visible region calculated using PBE0 evGW-BSE/def2-TZVP at the optimized  $S_0$  geometries. Phenyl groups of DPEPhos and all hydrogen atoms are omitted for clarity. Color code: C (silver), N (cyan), O (red), P (yellow), Cu (mauve).

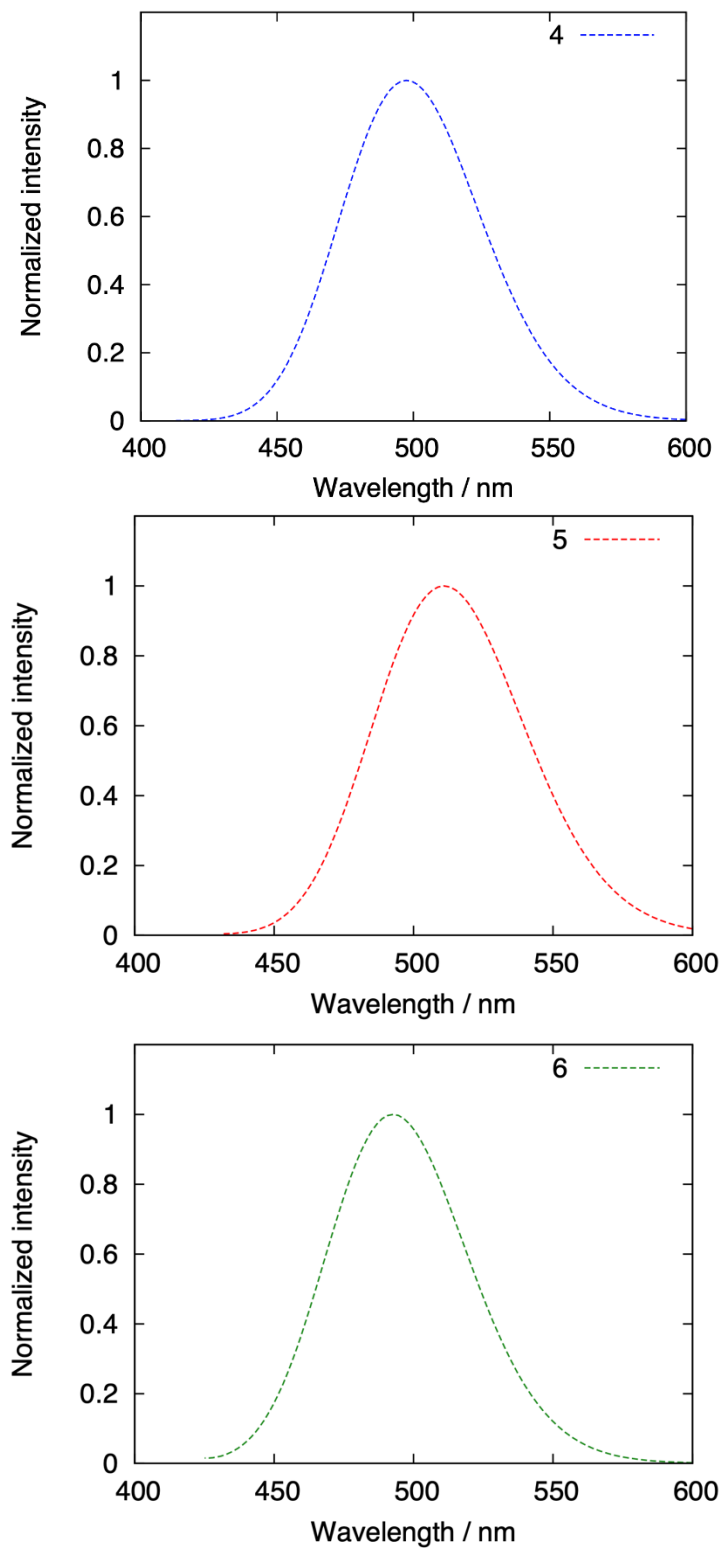

**Figure S5.3.** Emission spectra (FWHM = 0.3 eV) of compounds 4-6 calculated using PBE0 evGW-BSE/x2c-TZVPall-2c at the optimized  $T_1$  geometries.



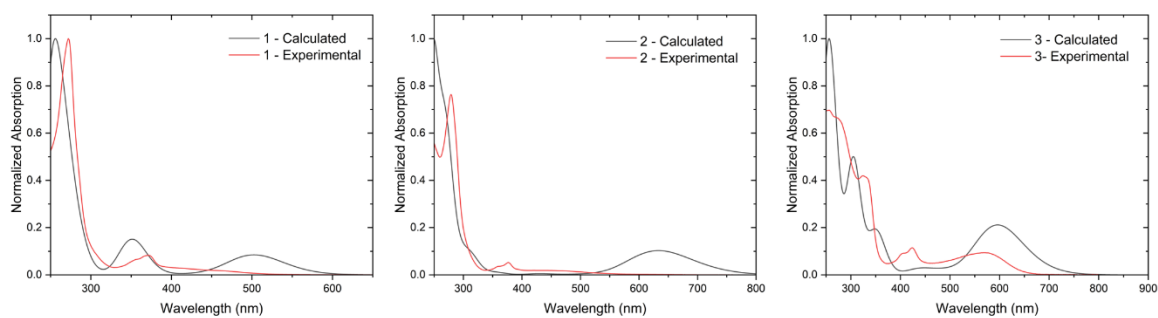

**Figure S5.4.** Comparison between the calculated (black curve) and experimental (red curve) absorption spectra of the complexes: **1** (left), **2** (middle), **3** (right).

## 6. Single crystal X-ray analysis

Single crystal X-ray diffraction data of compound **1** were collected on a STOE STADI VARI diffractometer with monochromated Ga  $K\alpha$  (1.34143 Å) radiation at 150 K. Using Olex2 [1], the structures were solved with the ShelXT [2] structure solution program using Intrinsic Phasing and refined with the ShelXL [3] refinement package using Least Squares minimization. Refinement was performed with anisotropic temperature factors for all non-hydrogen atoms (disordered atoms were refined isotropically); hydrogen atoms were calculated on idealized positions. Crystal data and refinement parameters of **1** are summarized in table S1.

Crystallographic data for compounds **1** reported in this paper have been deposited with the Cambridge Crystallographic Data Centre as supplementary information no. CCDC-2074014. Copies of the data can be obtained free of charge from <https://www.ccdc.cam.ac.uk/structures/>.

**Table S1** Crystal data and structure refinement for **1**.

|                   |                                |
|-------------------|--------------------------------|
| Empirical formula | $C_{60}H_{49}Cl_4CuF_4N_5OP_2$ |
| Formula weight    | 1210.13                        |
| Temperature/K     | 150                            |
| Crystal system    | triclinic                      |
| Space group       | $P1$                           |
| $a/\text{Å}$      | 14.6581(6)                     |
| $b/\text{Å}$      | 15.3265(7)                     |
| $c/\text{Å}$      | 16.0358(5)                     |
| $\alpha/^\circ$   | 62.258(3)                      |

|                                                |                                                                |
|------------------------------------------------|----------------------------------------------------------------|
| $\beta/^\circ$                                 | 79.347(3)                                                      |
| $\gamma/^\circ$                                | 62.225(3)                                                      |
| Volume/ $\text{\AA}^3$                         | 2818.7(2)                                                      |
| Z                                              | 2                                                              |
| $\rho_{\text{calc}}/\text{g}/\text{cm}^3$      | 1.426                                                          |
| $\mu/\text{mm}^{-1}$                           | 3.899                                                          |
| F(000)                                         | 1240.0                                                         |
| Crystal size/ $\text{mm}^3$                    | $0.18 \times 0.16 \times 0.14$                                 |
| Radiation                                      | GaK $\alpha$ ( $\lambda = 1.34143$ )                           |
| 2 $\theta$ range for data collection/ $^\circ$ | 5.422 to 125.132                                               |
| Index ranges                                   | $-19 \leq h \leq 12, -20 \leq k \leq 13, -21 \leq l \leq 21$   |
| Reflections collected                          | 38702                                                          |
| Independent reflections                        | 13345 [ $R_{\text{int}} = 0.0209, R_{\text{sigma}} = 0.0277$ ] |
| Ind. Refl. with $I \geq 2\sigma(I)$            | 10663                                                          |
| Data/restraints/parameters                     | 13345/0/704                                                    |
| Goodness-of-fit on $F^2$                       | 1.048                                                          |
| Final R indexes [ $I \geq 2\sigma(I)$ ]        | $R_1 = 0.0752, wR_2 = 0.2275$                                  |
| Final R indexes [all data]                     | $R_1 = 0.0904, wR_2 = 0.2424$                                  |
| Largest diff. peak/hole / $e \text{\AA}^{-3}$  | 1.29/-1.58                                                     |

## 7. References

- [1] O.V. Dolomanov, L.J. Bourhis, R.J. Gildea, J.A.K. Howard, H. Puschmann, *J. Appl. Cryst.* **2009**, *42*, 339–341.
- [2] G.M. Sheldrick, *Acta Cryst. A* **2015**, *A71*, 3–8.
- [3] G.M. Sheldrick, *Acta Cryst. C* **2015**, *C71*, 3–8.
